# Supplementary material
Source: PubMed Central journal article supplement (PMC3908545)
Supplement: NIHMS548350-supplement-02.pdf [file NIHMS548350-supplement-02.pdf]

## SUPPLEMENTARY TABLES

**Supplementary Table 1.** MCF-7/pLKO genes with expression significantly altered by 2-fold or greater in response  $\beta$ -estradiol.

| Gene    | Fold $\Delta^1$ | Description and Genbank Accession                                                                                               |
|---------|-----------------|---------------------------------------------------------------------------------------------------------------------------------|
| RASGRP1 | 30.4            | Homo sapiens RAS guanyl releasing protein 1 (calcium and DAG-regulated) (RASGRP1), transcript variant 1, mRNA [NM_005739]       |
| GREB1   | 28.8            | Homo sapiens growth regulation by estrogen in breast cancer 1 (GREB1), transcript variant a, mRNA [NM_014668]                   |
| GPR68   | 23.1            | Homo sapiens G protein-coupled receptor 68 (GPR68), mRNA [NM_003485]                                                            |
| CXCL12  | 21.8            | Homo sapiens chemokine (C-X-C motif) ligand 12 (stromal cell-derived factor 1) (CXCL12), transcript variant 1, mRNA [NM_199168] |
| EGR3    | 19.5            | Homo sapiens early growth response 3 (EGR3), mRNA [NM_004430]                                                                   |
| CYP1B1  | 14.5            | Homo sapiens cytochrome P450, family 1, subfamily B, polypeptide 1 (CYP1B1), mRNA [NM_000104]                                   |
| CXCL12  | 11.4            | Homo sapiens chemokine (C-X-C motif) ligand 12 (stromal cell-derived factor 1) (CXCL12), transcript variant 2, mRNA [NM_000609] |
| MPPED2  | 11.3            | Homo sapiens metallophosphoesterase domain containing 2 (MPPED2), transcript variant 1, mRNA [NM_001584]                        |
| AMZ1    | 11.2            | Homo sapiens archaelysin family metallopeptidase 1 (AMZ1), mRNA [NM_133463]                                                     |
| CYP1B1  | 10.3            | Homo sapiens cytochrome P450, family 1, subfamily B, polypeptide 1 (CYP1B1), mRNA [NM_000104]                                   |
| GREB1   | 10.0            | Homo sapiens growth regulation by estrogen in breast cancer 1 (GREB1), transcript variant c, mRNA [NM_148903]                   |
| CYP1A1  | 10.0            | Homo sapiens cytochrome P450, family 1, subfamily A, polypeptide 1 (CYP1A1), mRNA [NM_000499]                                   |
| MYC     | 9.7             | Homo sapiens v-myc myelocytomatosis viral oncogene homolog (avian) (MYC), mRNA [NM_002467]                                      |
| FOS     | 9.6             | Homo sapiens FBJ murine osteosarcoma viral oncogene homolog (FOS), mRNA [NM_005252]                                             |
| TSKU    | 9.3             | Homo sapiens tsukushin (TSKU), mRNA [NM_015516]                                                                                 |
| SGK3    | 8.7             | Homo sapiens serum/glucocorticoid regulated kinase family, member 3 (SGK3), transcript variant 1, mRNA [NM_013257]              |
| HSPB8   | 7.4             | Homo sapiens heat shock 22kDa protein 8 (HSPB8), mRNA [NM_014365]                                                               |
| KCNK5   | 7.0             | Homo sapiens potassium channel, subfamily K, member 5 (KCNK5), mRNA [NM_003740]                                                 |
| MYBL1   | 6.6             | Homo sapiens v-myb myeloblastosis viral oncogene homolog (avian)-like 1 (MYBL1), transcript variant 1, mRNA [NM_001080416]      |
| SLC26A2 | 6.4             | Homo sapiens solute carrier family 26 (sulfate transporter), member 2 (SLC26A2), mRNA [NM_000112]                               |
| TAF4B   | 6.2             | Homo sapiens TAF4b RNA polymerase II, TATA box binding protein (TBP)-associated factor, 105kDa (TAF4B), mRNA [NM_005640]        |
| NOS1AP  | 6.1             | Homo sapiens nitric oxide synthase 1 (neuronal) adaptor protein (NOS1AP), transcript variant 1, mRNA [NM_014697]                |
| MYB     | 6.0             | Homo sapiens v-myb myeloblastosis viral oncogene homolog (avian) (MYB), transcript variant 2, mRNA [NM_005375]                  |
| AEN     | 5.8             | Homo sapiens apoptosis enhancing nuclease (AEN), mRNA [NM_022767]                                                               |
| CA12    | 5.8             | Homo sapiens carbonic anhydrase XII (CA12), transcript variant 1, mRNA [NM_001218]                                              |
| SLC7A5  | 5.8             | Homo sapiens solute carrier family 7 (cationic amino acid transporter, y+ system), member 5 (SLC7A5), mRNA [NM_003486]          |
| PIGW    | 5.6             | Homo sapiens phosphatidylinositol glycan anchor biosynthesis, class W (PIGW), mRNA [NM_178517]                                  |
| ADAT2   | 5.5             | Homo sapiens adenosine deaminase, tRNA-specific 2, TAD2 homolog ( <i>S. cerevisiae</i> ) (ADAT2), mRNA [NM_182503]              |
| SVIL    | 5.4             | Homo sapiens supervillin (SVIL), transcript variant 2, mRNA [NM_021738]                                                         |
| RBM24   | 5.3             | Homo sapiens RNA binding motif protein 24 (RBM24), transcript variant 2, mRNA [NM_153020]                                       |
| PRDM12  | 5.3             | Homo sapiens PR domain containing 12 (PRDM12), mRNA [NM_021619]                                                                 |
| IRS1    | 5.2             | Homo sapiens insulin receptor substrate 1 (IRS1), mRNA [NM_005544]                                                              |
| IL6ST   | 5.2             | Homo sapiens interleukin 6 signal transducer (gp130, oncostatin M receptor) (IL6ST), transcript variant 2, mRNA [NM_175767]     |
| PLCB2   | 5.2             | Homo sapiens phospholipase C, beta 2 (PLCB2), mRNA [NM_004573]                                                                  |

|          |     |                                                                                                                                                                                    |
|----------|-----|------------------------------------------------------------------------------------------------------------------------------------------------------------------------------------|
| NUDCD1   | 5.2 | Homo sapiens NudC domain containing 1 (NUDCD1), transcript variant 1, mRNA [NM_032869]                                                                                             |
| C1QTNF6  | 5.1 | Homo sapiens C1q and tumor necrosis factor related protein 6 (C1QTNF6), transcript variant 1, mRNA [NM_031910]                                                                     |
| TNPO1    | 5.1 | Homo sapiens transportin 1 (TNPO1), transcript variant 1, mRNA [NM_002270]                                                                                                         |
| SLC14A1  | 4.9 | Homo sapiens solute carrier family 14 (urea transporter), member 1 (Kidd blood group) (SLC14A1), transcript variant 4, mRNA [NM_001146037]                                         |
| WDR36    | 4.9 | Homo sapiens WD repeat domain 36 (WDR36), mRNA [NM_139281]                                                                                                                         |
| NRAP     | 4.9 | Homo sapiens nebulin-related anchoring protein (NRAP), transcript variant 2, mRNA [NM_198060]                                                                                      |
| DDX21    | 4.8 | Homo sapiens DEAD (Asp-Glu-Ala-Asp) box polypeptide 21 (DDX21), mRNA [NM_004728]                                                                                                   |
| CCDC76   | 4.8 | Homo sapiens coiled-coil domain containing 76 (CCDC76), mRNA [NM_019083]                                                                                                           |
| NR1D2    | 4.7 | Homo sapiens nuclear receptor subfamily 1, group D, member 2 (NR1D2), transcript variant 1, mRNA [NM_005126]                                                                       |
| NBPF6    | 4.6 | Homo sapiens neuroblastoma breakpoint family, member 6 (NBPF6), transcript variant 2, mRNA [NM_001143988]                                                                          |
| ELOVL2   | 4.5 | Homo sapiens elongation of very long chain fatty acids (FEN1/Elo2, SUR4/Elo3, yeast)-like 2 (ELOVL2), mRNA [NM_017770]                                                             |
| LEF1     | 4.5 | Homo sapiens lymphoid enhancer-binding factor 1 (LEF1), transcript variant 1, mRNA [NM_016269]                                                                                     |
| AREG     | 4.4 | Homo sapiens amphiregulin (AREG), mRNA [NM_001657]                                                                                                                                 |
| PDE4A    | 4.4 | Homo sapiens phosphodiesterase 4A, cAMP-specific (phosphodiesterase E2 dunce homolog, Drosophila) (PDE4A), transcript variant 4, mRNA [NM_006202]                                  |
| RAB37    | 4.4 | Homo sapiens RAB37, member RAS oncogene family (RAB37), transcript variant 3, mRNA [NM_175738]                                                                                     |
| SMARCAD1 | 4.4 | Homo sapiens SWI/SNF-related, matrix-associated actin-dependent regulator of chromatin, subfamily a, containing DEAD/H box 1 (SMARCAD1), transcript variant 1, mRNA [NM_001128429] |
| RRP15    | 4.4 | Homo sapiens ribosomal RNA processing 15 homolog (S. cerevisiae) (RRP15), mRNA [NM_016052]                                                                                         |
| SUSD3    | 4.3 | Homo sapiens sushi domain containing 3 (SUSD3), mRNA [NM_145006]                                                                                                                   |
| BCL2     | 4.3 | Homo sapiens B-cell CLL/lymphoma 2 (BCL2), nuclear gene encoding mitochondrial protein, transcript variant alpha, mRNA [NM_000633]                                                 |
| PHF14    | 4.2 | Homo sapiens PHD finger protein 14 (PHF14), transcript variant 2, mRNA [NM_014660]                                                                                                 |
| AREG     | 4.2 | Homo sapiens amphiregulin (AREG), mRNA [NM_001657]                                                                                                                                 |
| CAMSAP1  | 4.2 | Homo sapiens calmodulin regulated spectrin-associated protein 1 (CAMSAP1), mRNA [NM_015447]                                                                                        |
| NR1D2    | 4.2 | Homo sapiens nuclear receptor subfamily 1, group D, member 2 (NR1D2), transcript variant 1, mRNA [NM_005126]                                                                       |
| ARC      | 4.1 | Homo sapiens activity-regulated cytoskeleton-associated protein (ARC), mRNA [NM_015193]                                                                                            |
| HBEGF    | 4.1 | Homo sapiens heparin-binding EGF-like growth factor (HBEGF), mRNA [NM_001945]                                                                                                      |
| BCL2L15  | 4.1 | Homo sapiens BCL2-like 15 (BCL2L15), mRNA [NM_001010922]                                                                                                                           |
| TPD52L1  | 4.1 | Homo sapiens tumor protein D52-like 1 (TPD52L1), transcript variant 4, mRNA [NM_001003397]                                                                                         |
| LRPPRC   | 4.1 | Homo sapiens leucine-rich PPR-motif containing (LRPPRC), mRNA [NM_133259]                                                                                                          |
| ANKH     | 4.1 | Homo sapiens ankylosis, progressive homolog (mouse) (ANKH), mRNA [NM_054027]                                                                                                       |
| RAPGEFL1 | 4.1 | Homo sapiens Rap guanine nucleotide exchange factor (GEF)-like 1 (RAPGEFL1), mRNA [NM_016339]                                                                                      |
| GPHA2    | 4.1 | Homo sapiens glycoprotein hormone alpha 2 (GPHA2), mRNA [NM_130769]                                                                                                                |
| IGFBP4   | 4.0 | Homo sapiens insulin-like growth factor binding protein 4 (IGFBP4), mRNA [NM_001552]                                                                                               |
| PGLYRP2  | 4.0 | Homo sapiens peptidoglycan recognition protein 2 (PGLYRP2), mRNA [NM_052890]                                                                                                       |
| RHOBTB1  | 4.0 | Homo sapiens Rho-related BTB domain containing 1 (RHOBTB1), transcript variant 1, mRNA [NM_014836]                                                                                 |
| NEDD9    | 4.0 | Homo sapiens neural precursor cell expressed, developmentally down-regulated 9 (NEDD9), transcript variant 1, mRNA [NM_006403]                                                     |
| SLC3A2   | 4.0 | Homo sapiens solute carrier family 3 (activators of dibasic and neutral amino acid transport), member 2 (SLC3A2), transcript variant 1, mRNA [NM_001012661]                        |
| THADA    | 4.0 | Homo sapiens thyroid adenoma associated (THADA), transcript variant 3, mRNA [NM_001083953]                                                                                         |
| ZMYM6    | 3.9 | Homo sapiens zinc finger, MYM-type 6 (ZMYM6), mRNA [NM_007167]                                                                                                                     |
| RAP1GAP2 | 3.9 | Homo sapiens RAP1 GTPase activating protein 2 (RAP1GAP2), transcript variant 1, mRNA [NM_015085]                                                                                   |
| LONRF1   | 3.9 | Homo sapiens LON peptidase N-terminal domain and ring finger 1 (LONRF1), mRNA [NM_152271]                                                                                          |
| USP31    | 3.9 | Homo sapiens ubiquitin specific peptidase 31 (USP31), mRNA [NM_020718]                                                                                                             |

|          |     |                                                                                                                                                                |
|----------|-----|----------------------------------------------------------------------------------------------------------------------------------------------------------------|
| ATXN3    | 3.9 | Homo sapiens ataxin 3 (ATXN3), transcript variant reference, mRNA [NM_004993]                                                                                  |
| RAB33A   | 3.9 | Homo sapiens RAB33A, member RAS oncogene family (RAB33A), mRNA [NM_004794]                                                                                     |
| GPR77    | 3.9 | Homo sapiens G protein-coupled receptor 77 (GPR77), mRNA [NM_018485]                                                                                           |
| USP25    | 3.8 | Homo sapiens ubiquitin specific peptidase 25 (USP25), mRNA [NM_013396]                                                                                         |
| RGNEF    | 3.8 | Homo sapiens Rho-guanine nucleotide exchange factor (RGNEF), mRNA [NM_001080479]                                                                               |
| PITPNM2  | 3.8 | Homo sapiens phosphatidylinositol transfer protein, membrane-associated 2 (PITPNM2), mRNA [NM_020845]                                                          |
| TMEM170B | 3.8 | Homo sapiens transmembrane protein 170B (TMEM170B), mRNA [NM_001100829]                                                                                        |
| CYP27B1  | 3.8 | Homo sapiens cytochrome P450, family 27, subfamily B, polypeptide 1 (CYP27B1), nuclear gene encoding mitochondrial protein, mRNA [NM_000785]                   |
| ABHD2    | 3.8 | Homo sapiens abhydrolase domain containing 2 (ABHD2), transcript variant 1, mRNA [NM_007011]                                                                   |
| AKAP1    | 3.7 | Homo sapiens A kinase (PRKA) anchor protein 1 (AKAP1), nuclear gene encoding mitochondrial protein, mRNA [NM_003488]                                           |
| SLC2A1   | 3.7 | Homo sapiens solute carrier family 2 (facilitated glucose transporter), member 1 (SLC2A1), mRNA [NM_006516]                                                    |
| SIAH2    | 3.7 | Homo sapiens seven in absentia homolog 2 (Drosophila) (SIAH2), mRNA [NM_005067]                                                                                |
| NBPF22P  | 3.7 | Homo sapiens neuroblastoma breakpoint family, member 22 (pseudogene) (NBPF22P), non-coding RNA [NR_003719]                                                     |
| POLR3G   | 3.7 | Homo sapiens polymerase (RNA) III (DNA directed) polypeptide G (32kD) (POLR3G), mRNA [NM_006467]                                                               |
| ZNF700   | 3.7 | Homo sapiens zinc finger protein 700 (ZNF700), mRNA [NM_144566]                                                                                                |
| NAV2     | 3.7 | Homo sapiens neuron navigator 2 (NAV2), transcript variant 1, mRNA [NM_182964]                                                                                 |
| MINA     | 3.7 | Homo sapiens MYC induced nuclear antigen (MINA), transcript variant 1, mRNA [NM_001042533]                                                                     |
| IFIT3    | 3.7 | Homo sapiens interferon-induced protein with tetratricopeptide repeats 3 (IFIT3), transcript variant 1, mRNA [NM_001549]                                       |
| NT5DC3   | 3.7 | Homo sapiens 5'-nucleotidase domain containing 3 (NT5DC3), mRNA [NM_001031701]                                                                                 |
| SR140    | 3.7 | Homo sapiens U2-associated SR140 protein (SR140), mRNA [NM_001080415]                                                                                          |
| NRIP1    | 3.7 | Homo sapiens nuclear receptor interacting protein 1 (NRIP1), mRNA [NM_003489]                                                                                  |
| WDFY4    | 3.6 | Homo sapiens WDFY family member 4 (WDFY4), mRNA [NM_020945]                                                                                                    |
| PADI1    | 3.6 | Homo sapiens peptidyl arginine deiminase, type I (PADI1), mRNA [NM_013358]                                                                                     |
| GARNL3   | 3.6 | Homo sapiens GTPase activating Rap/RanGAP domain-like 3 (GARNL3), mRNA [NM_032293]                                                                             |
| HSPA4L   | 3.6 | Homo sapiens heat shock 70kDa protein 4-like (HSPA4L), mRNA [NM_014278]                                                                                        |
| BHLHE41  | 3.6 | Homo sapiens basic helix-loop-helix family, member e41 (BHLHE41), mRNA [NM_030762]                                                                             |
| ANKRD13B | 3.6 | Homo sapiens ankyrin repeat domain 13B (ANKRD13B), mRNA [NM_152345]                                                                                            |
| KRT37    | 3.6 | Homo sapiens keratin 37 (KRT37), mRNA [NM_003770]                                                                                                              |
| NAV2     | 3.6 | Homo sapiens neuron navigator 2 (NAV2), transcript variant 1, mRNA [NM_182964]                                                                                 |
| PALB2    | 3.6 | Homo sapiens partner and localizer of BRCA2 (PALB2), mRNA [NM_024675]                                                                                          |
| TOMM70A  | 3.5 | Homo sapiens translocase of outer mitochondrial membrane 70 homolog A (S. cerevisiae) (TOMM70A), nuclear gene encoding mitochondrial protein, mRNA [NM_014820] |
| USP15    | 3.5 | Homo sapiens ubiquitin specific peptidase 15 (USP15), mRNA [NM_006313]                                                                                         |
| MTX3     | 3.5 | Homo sapiens metaxin 3 (MTX3), mRNA [NM_001010891]                                                                                                             |
| DGAT2    | 3.5 | Homo sapiens diacylglycerol O-acyltransferase homolog 2 (mouse) (DGAT2), mRNA [NM_032564]                                                                      |
| STC2     | 3.5 | Homo sapiens stanniocalcin 2 (STC2), mRNA [NM_003714]                                                                                                          |
| ZNF343   | 3.5 | Homo sapiens zinc finger protein 343 (ZNF343), mRNA [NM_024325]                                                                                                |
| SEC23B   | 3.5 | Homo sapiens Sec23 homolog B (S. cerevisiae) (SEC23B), transcript variant 2, mRNA [NM_032985]                                                                  |
| ITPR1    | 3.5 | Homo sapiens inositol 1,4,5-triphosphate receptor, type 1 (ITPR1), transcript variant 2, mRNA [NM_002222]                                                      |
| CCND1    | 3.5 | Homo sapiens cyclin D1 (CCND1), mRNA [NM_053056]                                                                                                               |
| ATAD5    | 3.5 | Homo sapiens ATPase family, AAA domain containing 5 (ATAD5), mRNA [NM_024857]                                                                                  |
| ZNF25    | 3.5 | Homo sapiens zinc finger protein 25 (ZNF25), mRNA [NM_145011]                                                                                                  |
| ZMAT1    | 3.4 | Homo sapiens zinc finger, matrin type 1 (ZMAT1), transcript variant 3, mRNA [NM_032441]                                                                        |

|         |     |                                                                                                                                          |
|---------|-----|------------------------------------------------------------------------------------------------------------------------------------------|
| RAMP1   | 3.4 | Homo sapiens receptor (G protein-coupled) activity modifying protein 1 (RAMP1), mRNA [NM_005855]                                         |
| ANKH    | 3.4 | Homo sapiens ankylosis, progressive homolog (mouse) (ANKH), mRNA [NM_054027]                                                             |
| HTRA3   | 3.4 | Homo sapiens Htra serine peptidase 3 (HTRA3), mRNA [NM_053044]                                                                           |
| CCDC138 | 3.4 | Homo sapiens coiled-coil domain containing 138 (CCDC138), mRNA [NM_144978]                                                               |
| BDP1    | 3.4 | Homo sapiens B double prime 1, subunit of RNA polymerase III transcription initiation factor IIIB (BDP1), mRNA [NM_018429]               |
| RCN1    | 3.4 | Homo sapiens reticulocalbin 1, EF-hand calcium binding domain (RCN1), mRNA [NM_002901]                                                   |
| NRIP1   | 3.4 | Homo sapiens nuclear receptor interacting protein 1 (NRIP1), mRNA [NM_003489]                                                            |
| FAR1    | 3.4 | Homo sapiens fatty acyl CoA reductase 1 (FAR1), mRNA [NM_032228]                                                                         |
| FAM86B1 | 3.4 | Homo sapiens family with sequence similarity 86, member B1 (FAM86B1), transcript variant 1, mRNA [NM_001083537]                          |
| VPRBP   | 3.4 | Homo sapiens Vpr (HIV-1) binding protein (VPRBP), mRNA [NM_014703]                                                                       |
| SCNN1A  | 3.4 | Homo sapiens sodium channel, nonvoltage-gated 1 alpha (SCNN1A), transcript variant 1, mRNA [NM_001038]                                   |
| KIF18A  | 3.4 | Homo sapiens kinesin family member 18A (KIF18A), mRNA [NM_031217]                                                                        |
| UAP1    | 3.4 | Homo sapiens UDP-N-acetylglucosamine pyrophosphorylase 1 (UAP1), mRNA [NM_003115]                                                        |
| CTRL    | 3.3 | Homo sapiens chymotrypsin-like (CTRL), mRNA [NM_001907]                                                                                  |
| GOLGB1  | 3.3 | Homo sapiens golgin B1, golgi integral membrane protein (GOLGB1), mRNA [NM_004487]                                                       |
| PFAS    | 3.3 | Homo sapiens phosphoribosylformylglycinamide synthase (PFAS), mRNA [NM_012393]                                                           |
| RET     | 3.3 | Homo sapiens ret proto-oncogene (RET), transcript variant 2, mRNA [NM_020975]                                                            |
| MED13L  | 3.3 | Homo sapiens mediator complex subunit 13-like (MED13L), mRNA [NM_015335]                                                                 |
| SEC63   | 3.3 | Homo sapiens SEC63 homolog (S. cerevisiae) (SEC63), mRNA [NM_007214]                                                                     |
| ZNF529  | 3.3 | Homo sapiens zinc finger protein 529 (ZNF529), transcript variant 2, mRNA [NM_020951]                                                    |
| RNF125  | 3.3 | Homo sapiens ring finger protein 125 (RNF125), mRNA [NM_017831]                                                                          |
| SLC30A9 | 3.3 | Homo sapiens solute carrier family 30 (zinc transporter), member 9 (SLC30A9), mRNA [NM_006345]                                           |
| MINA    | 3.3 | Homo sapiens MYC induced nuclear antigen (MINA), transcript variant 3, mRNA [NM_032778]                                                  |
| CDC73   | 3.3 | Homo sapiens cell division cycle 73, Paf1/RNA polymerase II complex component, homolog (S. cerevisiae) (CDC73), mRNA [NM_024529]         |
| ZNF761  | 3.3 | Homo sapiens zinc finger protein 761 (ZNF761), mRNA [NM_001008401]                                                                       |
| DGKE    | 3.3 | Homo sapiens diacylglycerol kinase, epsilon 64kDa (DGKE), mRNA [NM_003647]                                                               |
| HAAO    | 3.3 | Homo sapiens 3-hydroxyanthranilate 3,4-dioxygenase (HAAO), mRNA [NM_012205]                                                              |
| DDX10   | 3.3 | Homo sapiens DEAD (Asp-Glu-Ala-Asp) box polypeptide 10 (DDX10), mRNA [NM_004398]                                                         |
| RIOK1   | 3.3 | Homo sapiens RIO kinase 1 (yeast) (RIOK1), transcript variant 2, mRNA [NM_153005]                                                        |
| PNPT1   | 3.2 | Homo sapiens polyribonucleotide nucleotidyltransferase 1 (PNPT1), mRNA [NM_033109]                                                       |
| NIN     | 3.2 | Homo sapiens ninein (GSK3B interacting protein) (NIN), transcript variant 2, mRNA [NM_020921]                                            |
| PDZK1   | 3.2 | Homo sapiens PDZ domain containing 1 (PDZK1), mRNA [NM_002614]                                                                           |
| AATK    | 3.2 | Homo sapiens apoptosis-associated tyrosine kinase (AATK), mRNA [NM_001080395]                                                            |
| TNNI2   | 3.2 | Homo sapiens troponin I type 2 (skeletal, fast) (TNNI2), transcript variant 1, mRNA [NM_003282]                                          |
| USP12   | 3.2 | Homo sapiens ubiquitin specific peptidase 12 (USP12), mRNA [NM_182488]                                                                   |
| NOL6    | 3.2 | Homo sapiens nucleolar protein family 6 (RNA-associated) (NOL6), transcript variant alpha, mRNA [NM_022917]                              |
| BLZF1   | 3.2 | Homo sapiens basic leucine zipper nuclear factor 1 (BLZF1), mRNA [NM_003666]                                                             |
| ITGA2   | 3.2 | Homo sapiens integrin, alpha 2 (CD49B, alpha 2 subunit of VLA-2 receptor) (ITGA2), mRNA [NM_002203]                                      |
| FAM198B | 3.2 | Homo sapiens family with sequence similarity 198, member B (FAM198B), transcript variant 2, mRNA [NM_016613]                             |
| SLC16A1 | 3.2 | Homo sapiens solute carrier family 16, member 1 (monocarboxylic acid transporter 1) (SLC16A1), transcript variant 2, mRNA [NM_001166496] |
| DUSP5   | 3.2 | Homo sapiens dual specificity phosphatase 5 (DUSP5), mRNA [NM_004419]                                                                    |
| RUNX2   | 3.2 | Homo sapiens runt-related transcription factor 2 (RUNX2), transcript variant 3, mRNA [NM_004348]                                         |

|          |     |                                                                                                                                         |
|----------|-----|-----------------------------------------------------------------------------------------------------------------------------------------|
| RNF20    | 3.2 | Homo sapiens ring finger protein 20 (RNF20), mRNA [NM_019592]                                                                           |
| AGPAT5   | 3.2 | Homo sapiens 1-acylglycerol-3-phosphate O-acyltransferase 5 (lysophosphatidic acid acyltransferase, epsilon) (AGPAT5), mRNA [NM_018361] |
| RAI14    | 3.2 | Homo sapiens retinoic acid induced 14 (RAI14), transcript variant 1, mRNA [NM_015577]                                                   |
| DDX31    | 3.2 | Homo sapiens DEAD (Asp-Glu-Ala-Asp) box polypeptide 31 (DDX31), transcript variant 2, mRNA [NM_138620]                                  |
| FREM2    | 3.2 | Homo sapiens FRAS1 related extracellular matrix protein 2 (FREM2), mRNA [NM_207361]                                                     |
| USP7     | 3.2 | Homo sapiens ubiquitin specific peptidase 7 (herpes virus-associated) (USP7), mRNA [NM_003470]                                          |
| ZSCAN1   | 3.1 | Homo sapiens zinc finger and SCAN domain containing 1 (ZSCAN1), mRNA [NM_182572]                                                        |
| WDR3     | 3.1 | Homo sapiens WD repeat domain 3 (WDR3), mRNA [NM_006784]                                                                                |
| SLC7A11  | 3.1 | Homo sapiens solute carrier family 7, (cationic amino acid transporter, y+ system) member 11 (SLC7A11), mRNA [NM_014331]                |
| NINL     | 3.1 | Homo sapiens ninein-like (NINL), mRNA [NM_025176]                                                                                       |
| NARG1    | 3.1 | Homo sapiens NMDA receptor regulated 1 (NARG1), mRNA [NM_057175]                                                                        |
| CWF19L2  | 3.1 | Homo sapiens CWF19-like 2, cell cycle control (S. pombe) (CWF19L2), mRNA [NM_152434]                                                    |
| R3HDM1   | 3.1 | Homo sapiens R3H domain containing 1 (R3HDM1), mRNA [NM_015361]                                                                         |
| SEMA3G   | 3.1 | Homo sapiens sema domain, immunoglobulin domain (Ig), short basic domain, secreted, (semaphorin) 3G (SEMA3G), mRNA [NM_020163]          |
| TNFRSF6B | 3.1 | Homo sapiens tumor necrosis factor receptor superfamily, member 6b, decoy (TNFRSF6B), transcript variant M68C, mRNA [NM_032945]         |
| E2F5     | 3.1 | Homo sapiens E2F transcription factor 5, p130-binding (E2F5), transcript variant 1, mRNA [NM_001951]                                    |
| ZNF326   | 3.1 | Homo sapiens zinc finger protein 326 (ZNF326), transcript variant 3, mRNA [NM_182975]                                                   |
| KCNF1    | 3.1 | Homo sapiens potassium voltage-gated channel, subfamily F, member 1 (KCNF1), mRNA [NM_002236]                                           |
| ZNF148   | 3.1 | Homo sapiens zinc finger protein 148 (ZNF148), mRNA [NM_021964]                                                                         |
| TMPRSS3  | 3.1 | Homo sapiens transmembrane protease, serine 3 (TMPRSS3), transcript variant D, mRNA [NM_032405]                                         |
| FAM71E1  | 3.1 | Homo sapiens family with sequence similarity 71, member E1 (FAM71E1), mRNA [NM_138411]                                                  |
| MPPED2   | 3.1 | Homo sapiens metallophosphoesterase domain containing 2 (MPPED2), transcript variant 1, mRNA [NM_001584]                                |
| NEDD9    | 3.0 | Homo sapiens neural precursor cell expressed, developmentally down-regulated 9 (NEDD9), transcript variant 2, mRNA [NM_182966]          |
| ARAP2    | 3.0 | Homo sapiens ArfGAP with RhoGAP domain, ankyrin repeat and PH domain 2 (ARAP2), mRNA [NM_015230]                                        |
| GALNT4   | 3.0 | Homo sapiens UDP-N-acetyl-alpha-D-galactosamine:polypeptide N-acetylgalactosaminyltransferase 4 (GalNAc-T4) (GALNT4), mRNA [NM_003774]  |
| ZNF3     | 3.0 | Homo sapiens zinc finger protein 3 (ZNF3), transcript variant 1, mRNA [NM_017715]                                                       |
| DSG2     | 3.0 | Homo sapiens desmoglein 2 (DSG2), mRNA [NM_001943]                                                                                      |
| SLITRK4  | 3.0 | Homo sapiens SLIT and NTRK-like family, member 4 (SLITRK4), mRNA [NM_173078]                                                            |
| ATXN1L   | 3.0 | Homo sapiens ataxin 1-like (ATXN1L), transcript variant 2, transcribed RNA [NR_024612]                                                  |
| TDRD10   | 3.0 | Homo sapiens tudor domain containing 10 (TDRD10), transcript variant 2, mRNA [NM_182499]                                                |
| EGR1     | 3.0 | Homo sapiens early growth response 1 (EGR1), mRNA [NM_001964]                                                                           |
| CEP110   | 3.0 | Homo sapiens centrosomal protein 110kDa (CEP110), mRNA [NM_007018]                                                                      |
| RBAK     | 3.0 | Homo sapiens RB-associated KRAB zinc finger (RBAK), mRNA [NM_021163]                                                                    |
| TPD52L1  | 3.0 | Homo sapiens tumor protein D52-like 1 (TPD52L1), transcript variant 2, mRNA [NM_001003395]                                              |
| TMED8    | 3.0 | Homo sapiens transmembrane emp24 protein transport domain containing 8 (TMED8), mRNA [NM_213601]                                        |
| IMPAD1   | 3.0 | Homo sapiens inositol monophosphatase domain containing 1 (IMPAD1), mRNA [NM_017813]                                                    |
| HMGCS1   | 3.0 | Homo sapiens 3-hydroxy-3-methylglutaryl-Coenzyme A synthase 1 (soluble) (HMGCS1), transcript variant 2, mRNA [NM_002130]                |
| ZNF330   | 3.0 | Homo sapiens zinc finger protein 330 (ZNF330), mRNA [NM_014487]                                                                         |
| METAP2   | 3.0 | Homo sapiens methionyl aminopeptidase 2 (METAP2), mRNA [NM_006838]                                                                      |
| IER3     | 3.0 | Homo sapiens immediate early response 3 (IER3), mRNA [NM_003897]                                                                        |
| TFAP4    | 3.0 | Homo sapiens transcription factor AP-4 (activating enhancer binding protein 4) (TFAP4), mRNA [NM_003223]                                |

|         |     |                                                                                                                                                         |
|---------|-----|---------------------------------------------------------------------------------------------------------------------------------------------------------|
| RNMT    | 3.0 | Homo sapiens RNA (guanine-7-) methyltransferase (RNMT), mRNA [NM_003799]                                                                                |
| TUBGCP5 | 3.0 | Homo sapiens tubulin, gamma complex associated protein 5 (TUBGCP5), transcript variant 1, mRNA [NM_052903]                                              |
| FHL2    | 3.0 | Homo sapiens four and a half LIM domains 2 (FHL2), transcript variant 2, mRNA [NM_201555]                                                               |
| FGD3    | 2.9 | Homo sapiens FYVE, RhoGEF and PH domain containing 3 (FGD3), transcript variant 2, mRNA [NM_033086]                                                     |
| BRWD1   | 2.9 | Homo sapiens bromodomain and WD repeat domain containing 1 (BRWD1), transcript variant 2, mRNA [NM_033656]                                              |
| DDX10   | 2.9 | Homo sapiens DEAD (Asp-Glu-Ala-Asp) box polypeptide 10 (DDX10), mRNA [NM_004398]                                                                        |
| ATF3    | 2.9 | Homo sapiens activating transcription factor 3 (ATF3), transcript variant 4, mRNA [NM_001040619]                                                        |
| ZNF473  | 2.9 | Homo sapiens zinc finger protein 473 (ZNF473), transcript variant 1, mRNA [NM_015428]                                                                   |
| NBPF6   | 2.9 | Homo sapiens neuroblastoma breakpoint family, member 6 (NBPF6), transcript variant 1, mRNA [NM_001143987]                                               |
| NFATC3  | 2.9 | Homo sapiens nuclear factor of activated T-cells, cytoplasmic, calcineurin-dependent 3 (NFATC3), transcript variant 4, mRNA [NM_173164]                 |
| AHI1    | 2.9 | Homo sapiens Abelson helper integration site 1 (AHI1), transcript variant 2, mRNA [NM_017651]                                                           |
| MAK16   | 2.9 | Homo sapiens MAK16 homolog (S. cerevisiae) (MAK16), mRNA [NM_032509]                                                                                    |
| ATF3    | 2.9 | Homo sapiens activating transcription factor 3 (ATF3), transcript variant 4, mRNA [NM_001040619]                                                        |
| USP34   | 2.9 | Homo sapiens ubiquitin specific peptidase 34 (USP34), mRNA [NM_014709]                                                                                  |
| PUS1    | 2.9 | Homo sapiens pseudouridylylase synthase 1 (PUS1), transcript variant 1, mRNA [NM_025215]                                                                |
| CACNA1D | 2.9 | Homo sapiens calcium channel, voltage-dependent, L type, alpha 1D subunit (CACNA1D), transcript variant 1, mRNA [NM_000720]                             |
| PNN     | 2.9 | Homo sapiens pinin, desmosome associated protein (PNN), mRNA [NM_002687]                                                                                |
| SLC38A2 | 2.9 | Homo sapiens solute carrier family 38, member 2 (SLC38A2), mRNA [NM_018976]                                                                             |
| USP45   | 2.9 | Homo sapiens ubiquitin specific peptidase 45 (USP45), mRNA [NM_001080481]                                                                               |
| H19     | 2.9 | Homo sapiens H19, imprinted maternally expressed transcript (non-protein coding) (H19), non-coding RNA [NR_002196]                                      |
| SACS    | 2.9 | Homo sapiens spastic ataxia of Charlevoix-Saguenay (sacsin) (SACS), mRNA [NM_014363]                                                                    |
| CLASP2  | 2.9 | Homo sapiens cytoplasmic linker associated protein 2 (CLASP2), mRNA [NM_015097]                                                                         |
| PCOLCE2 | 2.9 | Homo sapiens procollagen C-endopeptidase enhancer 2 (PCOLCE2), mRNA [NM_013363]                                                                         |
| RRP12   | 2.9 | Homo sapiens ribosomal RNA processing 12 homolog (S. cerevisiae) (RRP12), transcript variant 1, mRNA [NM_015179]                                        |
| TAF4B   | 2.9 | Homo sapiens TAF4b RNA polymerase II, TATA box binding protein (TBP)-associated factor, 105kDa (TAF4B), mRNA [NM_005640]                                |
| FJX1    | 2.9 | Homo sapiens four jointed box 1 (Drosophila) (FJX1), mRNA [NM_014344]                                                                                   |
| MITF    | 2.9 | Homo sapiens microphthalmia-associated transcription factor (MITF), transcript variant 1, mRNA [NM_198159]                                              |
| PDE6A   | 2.9 | Homo sapiens phosphodiesterase 6A, cGMP-specific, rod, alpha (PDE6A), mRNA [NM_000440]                                                                  |
| TBC1D4  | 2.9 | Homo sapiens TBC1 domain family, member 4 (TBC1D4), mRNA [NM_014832]                                                                                    |
| ACOX2   | 2.9 | Homo sapiens acyl-Coenzyme A oxidase 2, branched chain (ACOX2), mRNA [NM_003500]                                                                        |
| EMCN    | 2.9 | Homo sapiens endomucin (EMCN), transcript variant 1, mRNA [NM_016242]                                                                                   |
| NOC3L   | 2.9 | Homo sapiens nucleolar complex associated 3 homolog (S. cerevisiae) (NOC3L), mRNA [NM_022451]                                                           |
| UBE2N   | 2.8 | Homo sapiens ubiquitin-conjugating enzyme E2N (UBC13 homolog, yeast) (UBE2N), mRNA [NM_003348]                                                          |
| TAF5L   | 2.8 | Homo sapiens TAF5-like RNA polymerase II, p300/CBP-associated factor (PCAF)-associated factor, 65kDa (TAF5L), transcript variant 2, mRNA [NM_001025247] |
| XPOT    | 2.8 | Homo sapiens exportin, tRNA (nuclear export receptor for tRNAs) (XPOT), mRNA [NM_007235]                                                                |
| AQR     | 2.8 | Homo sapiens aquarius homolog (mouse) (AQR), mRNA [NM_014691]                                                                                           |
| TAF1A   | 2.8 | Homo sapiens TATA box binding protein (TBP)-associated factor, RNA polymerase I, A, 48kDa (TAF1A), transcript variant 1, mRNA [NM_005681]               |
| SLC26A1 | 2.8 | Homo sapiens solute carrier family 26 (sulfate transporter), member 1 (SLC26A1), transcript variant 2, mRNA [NM_134425]                                 |
| MREG    | 2.8 | Homo sapiens melanoregulin (MREG), mRNA [NM_018000]                                                                                                     |
| WDR74   | 2.8 | Homo sapiens cDNA FLJ78749 complete cds, highly similar to Homo sapiens WD repeat domain 74 (WDR74), mRNA [AK292330]                                    |
| AMICA1  | 2.8 | Homo sapiens adhesion molecule, interacts with CXADR antigen 1 (AMICA1), transcript variant 2, mRNA [NM_153206]                                         |

|          |     |                                                                                                                                                             |
|----------|-----|-------------------------------------------------------------------------------------------------------------------------------------------------------------|
| PMPCB    | 2.8 | Homo sapiens peptidase (mitochondrial processing) beta (PMPCB), nuclear gene encoding mitochondrial protein, mRNA [NM_004279]                               |
| CISH     | 2.8 | Homo sapiens cytokine inducible SH2-containing protein (CISH), transcript variant 2, mRNA [NM_145071]                                                       |
| OBFC2A   | 2.8 | Homo sapiens oligonucleotide/oligosaccharide-binding fold containing 2A (OBFC2A), transcript variant 1, mRNA [NM_001031716]                                 |
| MTHFD1L  | 2.8 | Homo sapiens methylenetetrahydrofolate dehydrogenase (NADP+ dependent) 1-like (MTHFD1L), mRNA [NM_015440]                                                   |
| PPM1K    | 2.8 | Homo sapiens protein phosphatase 1K (PP2C domain containing) (PPM1K), mRNA [NM_152542]                                                                      |
| ZNF643   | 2.8 | Homo sapiens zinc finger protein 643 (ZNF643), mRNA [NM_023070]                                                                                             |
| MEX3B    | 2.7 | Homo sapiens mex-3 homolog B (C. elegans) (MEX3B), mRNA [NM_032246]                                                                                         |
| SH3BP5   | 2.7 | Homo sapiens SH3-domain binding protein 5 (BTK-associated) (SH3BP5), transcript variant 1, mRNA [NM_004844]                                                 |
| JMJD1C   | 2.7 | Homo sapiens jumonji domain containing 1C (JMJD1C), transcript variant 1, mRNA [NM_032776]                                                                  |
| ABI2     | 2.7 | Homo sapiens abl-interactor 2 (ABI2), mRNA [NM_005759]                                                                                                      |
| BCL2     | 2.7 | Homo sapiens B-cell CLL/lymphoma 2 (BCL2), nuclear gene encoding mitochondrial protein, transcript variant beta, mRNA [NM_000657]                           |
| NEAT1    | 2.7 | Human MEN1 region clone epsilon [AF001893]                                                                                                                  |
| WDR3     | 2.7 | Homo sapiens WD repeat domain 3 (WDR3), mRNA [NM_006784]                                                                                                    |
| MAP9     | 2.7 | Homo sapiens microtubule-associated protein 9 (MAP9), mRNA [NM_001039580]                                                                                   |
| IFIT2    | 2.7 | Homo sapiens interferon-induced protein with tetratricopeptide repeats 2 (IFIT2), mRNA [NM_001547]                                                          |
| IL6ST    | 2.7 | Homo sapiens interleukin 6 signal transducer (gp130, oncostatin M receptor) (IL6ST), transcript variant 1, mRNA [NM_002184]                                 |
| SFRS7    | 2.7 | Homo sapiens splicing factor, arginine/serine-rich 7, 35kDa (SFRS7), mRNA [NM_001031684]                                                                    |
| AHCTF1   | 2.7 | Homo sapiens AT hook containing transcription factor 1 (AHCTF1), mRNA [NM_015446]                                                                           |
| WDR43    | 2.7 | Homo sapiens WD repeat domain 43 (WDR43), mRNA [NM_015131]                                                                                                  |
| WDR12    | 2.7 | Homo sapiens WD repeat domain 12 (WDR12), mRNA [NM_018256]                                                                                                  |
| KDM4B    | 2.7 | Homo sapiens lysine (K)-specific demethylase 4B (KDM4B), mRNA [NM_015015]                                                                                   |
| ORC4L    | 2.7 | Homo sapiens origin recognition complex, subunit 4-like (yeast) (ORC4L), transcript variant 2, mRNA [NM_002552]                                             |
| GAB2     | 2.7 | Homo sapiens GRB2-associated binding protein 2 (GAB2), transcript variant 2, mRNA [NM_012296]                                                               |
| ZIC2     | 2.7 | Homo sapiens Zic family member 2 (odd-paired homolog, Drosophila) (ZIC2), mRNA [NM_007129]                                                                  |
| WDR35    | 2.7 | Homo sapiens WD repeat domain 35 (WDR35), transcript variant 1, mRNA [NM_001006657]                                                                         |
| ZCCHC7   | 2.7 | Homo sapiens zinc finger, CCHC domain containing 7 (ZCCHC7), mRNA [NM_032226]                                                                               |
| ZBTB8B   | 2.7 | Homo sapiens zinc finger and BTB domain containing 8B (ZBTB8B), mRNA [NM_001145720]                                                                         |
| EIF5A2   | 2.7 | Homo sapiens eukaryotic translation initiation factor 5A2 (EIF5A2), mRNA [NM_020390]                                                                        |
| ME3      | 2.7 | Homo sapiens malic enzyme 3, NADP(+)-dependent, mitochondrial (ME3), nuclear gene encoding mitochondrial protein, transcript variant 2, mRNA [NM_001014811] |
| RUVBL1   | 2.7 | Homo sapiens RuvB-like 1 (E. coli) (RUVBL1), mRNA [NM_003707]                                                                                               |
| AMD1     | 2.7 | Homo sapiens adenosylmethionine decarboxylase 1 (AMD1), transcript variant 1, mRNA [NM_001634]                                                              |
| POLR3G   | 2.7 | Homo sapiens polymerase (RNA) III (DNA directed) polypeptide G (32kD) (POLR3G), mRNA [NM_006467]                                                            |
| SERPINA3 | 2.7 | Homo sapiens serpin peptidase inhibitor, clade A (alpha-1 antiproteinase, antitrypsin), member 3 (SERPINA3), mRNA [NM_001085]                               |
| GDF15    | 2.7 | Homo sapiens growth differentiation factor 15 (GDF15), mRNA [NM_004864]                                                                                     |
| METTL1   | 2.6 | Homo sapiens methyltransferase like 1 (METTL1), transcript variant 1, mRNA [NM_005371]                                                                      |
| HEATR1   | 2.6 | Homo sapiens HEAT repeat containing 1 (HEATR1), mRNA [NM_018072]                                                                                            |
| JAK1     | 2.6 | Homo sapiens Janus kinase 1 (JAK1), mRNA [NM_002227]                                                                                                        |
| ADAL     | 2.6 | Homo sapiens adenosine deaminase-like (ADAL), transcript variant 2, mRNA [NM_001012969]                                                                     |
| ACVR2A   | 2.6 | Homo sapiens activin A receptor, type IIA (ACVR2A), mRNA [NM_001616]                                                                                        |
| MIA3     | 2.6 | Homo sapiens melanoma inhibitory activity family, member 3 (MIA3), mRNA [NM_198551]                                                                         |
| XPO6     | 2.6 | Homo sapiens exportin 6 (XPO6), mRNA [NM_015171]                                                                                                            |
| MLH3     | 2.6 | Homo sapiens mutL homolog 3 (E. coli) (MLH3), transcript variant 1, mRNA [NM_001040108]                                                                     |

|           |     |                                                                                                                                             |
|-----------|-----|---------------------------------------------------------------------------------------------------------------------------------------------|
| PGF       | 2.6 | Homo sapiens placental growth factor (PGF), mRNA [NM_002632]                                                                                |
| ZNF41     | 2.6 | Homo sapiens zinc finger protein 41 (ZNF41), transcript variant 2, mRNA [NM_153380]                                                         |
| ATXN1     | 2.6 | Homo sapiens ataxin 1 (ATXN1), transcript variant 1, mRNA [NM_000332]                                                                       |
| FAM119B   | 2.6 | Homo sapiens family with sequence similarity 119, member B (FAM119B), transcript variant 2, mRNA [NM_206914]                                |
| NECAB1    | 2.6 | Homo sapiens N-terminal EF-hand calcium binding protein 1 (NECAB1), mRNA [NM_022351]                                                        |
| SFRS12IP1 | 2.6 | Homo sapiens SFRS12-interacting protein 1 (SFRS12IP1), mRNA [NM_173829]                                                                     |
| ALMS1     | 2.6 | Homo sapiens Alstrom syndrome 1 (ALMS1), mRNA [NM_015120]                                                                                   |
| PDP2      | 2.6 | Homo sapiens pyruvate dehydrogenase phosphatase catalytic subunit 2 (PDP2), mRNA [NM_020786]                                                |
| AP4B1     | 2.6 | Homo sapiens adaptor-related protein complex 4, beta 1 subunit (AP4B1), mRNA [NM_006594]                                                    |
| FLJ44817  | 2.6 | Homo sapiens similar to pleckstrin homology domain protein (5V327) (FLJ44817), mRNA [NM_001161498]                                          |
| CD209     | 2.6 | Homo sapiens CD209 molecule (CD209), transcript variant 1, mRNA [NM_021155]                                                                 |
| ECE1      | 2.6 | Homo sapiens endothelin converting enzyme 1 (ECE1), transcript variant 3, mRNA [NM_001113347]                                               |
| SECISBP2  | 2.6 | Homo sapiens SECIS binding protein 2 (SECISBP2), mRNA [NM_024077]                                                                           |
| CAB39L    | 2.6 | Homo sapiens calcium binding protein 39-like (CAB39L), transcript variant 2, mRNA [NM_001079670]                                            |
| PER3      | 2.6 | Homo sapiens period homolog 3 (Drosophila) (PER3), mRNA [NM_016831]                                                                         |
| POLR1B    | 2.6 | Homo sapiens polymerase (RNA) I polypeptide B, 128kDa (POLR1B), transcript variant 1, mRNA [NM_019014]                                      |
| OTUD6B    | 2.6 | Homo sapiens OTU domain containing 6B (OTUD6B), mRNA [NM_016023]                                                                            |
| CRTC3     | 2.6 | Homo sapiens CREB regulated transcription coactivator 3 (CRTC3), transcript variant 1, mRNA [NM_022769]                                     |
| SLC27A2   | 2.6 | Homo sapiens solute carrier family 27 (fatty acid transporter), member 2 (SLC27A2), transcript variant 1, mRNA [NM_003645]                  |
| TGM2      | 2.6 | Homo sapiens transglutaminase 2 (C polypeptide, protein-glutamine-gamma-glutamyltransferase) (TGM2), transcript variant 2, mRNA [NM_198951] |
| CPLX1     | 2.6 | Homo sapiens complexin 1 (CPLX1), mRNA [NM_006651]                                                                                          |
| ENTPD3    | 2.6 | Homo sapiens ectonucleoside triphosphate diphosphohydrolase 3 (ENTPD3), mRNA [NM_001248]                                                    |
| SLC1A4    | 2.6 | Homo sapiens solute carrier family 1 (glutamate/neutral amino acid transporter), member 4 (SLC1A4), transcript variant 1, mRNA [NM_003038]  |
| RNF145    | 2.6 | Homo sapiens ring finger protein 145 (RNF145), mRNA [NM_144726]                                                                             |
| LMOD3     | 2.6 | Homo sapiens leiomodoin 3 (fetal) (LMOD3), mRNA [NM_198271]                                                                                 |
| RARA      | 2.6 | Homo sapiens retinoic acid receptor, alpha (RARA), transcript variant 2, mRNA [NM_001024809]                                                |
| DLC1      | 2.6 | Homo sapiens deleted in liver cancer 1 (DLC1), transcript variant 1, mRNA [NM_182643]                                                       |
| PKIB      | 2.6 | Homo sapiens protein kinase (cAMP-dependent, catalytic) inhibitor beta (PKIB), transcript variant 1, mRNA [NM_181795]                       |
| DNAH11    | 2.6 | Homo sapiens dynein, axonemal, heavy chain 11 (DNAH11), mRNA [NM_003777]                                                                    |
| NR5A2     | 2.6 | Homo sapiens nuclear receptor subfamily 5, group A, member 2 (NR5A2), transcript variant 1, mRNA [NM_205860]                                |
| AHI1      | 2.6 | Homo sapiens Abelson helper integration site 1 (AHI1), transcript variant 2, mRNA [NM_017651]                                               |
| CAMTA1    | 2.6 | Homo sapiens calmodulin binding transcription activator 1 (CAMTA1), mRNA [NM_015215]                                                        |
| GNA14     | 2.6 | Homo sapiens guanine nucleotide binding protein (G protein), alpha 14 (GNA14), mRNA [NM_004297]                                             |
| IRS2      | 2.6 | Homo sapiens insulin receptor substrate 2 (IRS2), mRNA [NM_003749]                                                                          |
| ZNHIT6    | 2.6 | Homo sapiens zinc finger, HIT type 6 (ZNHIT6), mRNA [NM_017953]                                                                             |
| WWC2      | 2.6 | Homo sapiens WW and C2 domain containing 2 (WWC2), mRNA [NM_024949]                                                                         |
| LDHA      | 2.6 | Homo sapiens lactate dehydrogenase A (LDHA), transcript variant 1, mRNA [NM_005566]                                                         |
| KRT23     | 2.6 | Homo sapiens keratin 23 (histone deacetylase inducible) (KRT23), mRNA [NM_015515]                                                           |
| IL20      | 2.6 | Homo sapiens interleukin 20 (IL20), mRNA [NM_018724]                                                                                        |
| LYAR      | 2.6 | Homo sapiens Ly1 antibody reactive homolog (mouse) (LYAR), transcript variant 1, mRNA [NM_017816]                                           |
| RAB11FIP2 | 2.6 | Homo sapiens RAB11 family interacting protein 2 (class I) (RAB11FIP2), mRNA [NM_014904]                                                     |
| SUSD4     | 2.6 | Homo sapiens sushi domain containing 4 (SUSD4), transcript variant 1, mRNA [NM_017982]                                                      |



|         |     |                                                                                                                                                                               |
|---------|-----|-------------------------------------------------------------------------------------------------------------------------------------------------------------------------------|
| TUBB4Q  | 2.6 | Homo sapiens tubulin, beta polypeptide 4, member Q (TUBB4Q), mRNA [NM_020040]                                                                                                 |
| MITF    | 2.6 | Homo sapiens microphthalmia-associated transcription factor (MITF), transcript variant 1, mRNA [NM_198159]                                                                    |
| IER3    | 2.6 | Homo sapiens immediate early response 3 (IER3), mRNA [NM_003897]                                                                                                              |
| GEMIN5  | 2.6 | Homo sapiens gem (nuclear organelle) associated protein 5 (GEMIN5), mRNA [NM_015465]                                                                                          |
| COL12A1 | 2.5 | Homo sapiens collagen, type XII, alpha 1 (COL12A1), transcript variant long, mRNA [NM_004370]                                                                                 |
| AGFG1   | 2.5 | Homo sapiens ArfGAP with FG repeats 1 (AGFG1), transcript variant 1, mRNA [NM_001135187]                                                                                      |
| ZNF551  | 2.5 | Homo sapiens zinc finger protein 551 (ZNF551), mRNA [NM_138347]                                                                                                               |
| MYBL1   | 2.5 | Homo sapiens v-myb myeloblastosis viral oncogene homolog (avian)-like 1 (MYBL1), transcript variant 2, mRNA [NM_001144755]                                                    |
| PFKFB3  | 2.5 | Homo sapiens 6-phosphofructo-2-kinase/fructose-2,6-biphosphatase 3 (PFKFB3), transcript variant 1, mRNA [NM_004566]                                                           |
| ZNF146  | 2.5 | Homo sapiens zinc finger protein 146 (ZNF146), transcript variant 1, mRNA [NM_007145]                                                                                         |
| ZNF26   | 2.5 | Homo sapiens zinc finger protein 26 (ZNF26), mRNA [NM_019591]                                                                                                                 |
| ABCE1   | 2.5 | Homo sapiens ATP-binding cassette, sub-family E (OABP), member 1 (ABCE1), transcript variant 1, mRNA [NM_002940]                                                              |
| ZNF434  | 2.5 | Homo sapiens zinc finger protein 434 (ZNF434), mRNA [NM_017810]                                                                                                               |
| MFSD2A  | 2.5 | Homo sapiens major facilitator superfamily domain containing 2A (MFSD2A), transcript variant 1, mRNA [NM_001136493]                                                           |
| TSEN2   | 2.5 | Homo sapiens tRNA splicing endonuclease 2 homolog (S. cerevisiae) (TSEN2), transcript variant 5, mRNA [NM_001145395]                                                          |
| KLF11   | 2.5 | Homo sapiens Kruppel-like factor 11 (KLF11), mRNA [NM_003597]                                                                                                                 |
| PRR22   | 2.5 | Homo sapiens proline rich 22 (PRR22), transcript variant 2, mRNA [NM_153359]                                                                                                  |
| COX10   | 2.5 | Homo sapiens COX10 homolog, cytochrome c oxidase assembly protein, heme A: farnesyltransferase (yeast) (COX10), nuclear gene encoding mitochondrial protein, mRNA [NM_001303] |
| LRIG1   | 2.5 | Homo sapiens leucine-rich repeats and immunoglobulin-like domains 1 (LRIG1), mRNA [NM_015541]                                                                                 |
| KCTD12  | 2.5 | Homo sapiens potassium channel tetramerisation domain containing 12 (KCTD12), mRNA [NM_138444]                                                                                |
| NOP56   | 2.5 | Homo sapiens NOP56 ribonucleoprotein homolog (yeast) (NOP56), transcript variant 1, mRNA [NM_006392]                                                                          |
| ZNF202  | 2.5 | Homo sapiens zinc finger protein 202 (ZNF202), mRNA [NM_003455]                                                                                                               |
| PMAIP1  | 2.5 | Homo sapiens phorbol-12-myristate-13-acetate-induced protein 1 (PMAIP1), mRNA [NM_021127]                                                                                     |
| CDNF    | 2.5 | Homo sapiens cerebral dopamine neurotrophic factor (CDNF), mRNA [NM_001029954]                                                                                                |
| INO80   | 2.5 | Homo sapiens INO80 homolog (S. cerevisiae) (INO80), mRNA [NM_017553]                                                                                                          |
| PION    | 2.5 | Homo sapiens pigeon homolog (Drosophila) (PION), mRNA [NM_017439]                                                                                                             |
| FCRLB   | 2.5 | Homo sapiens Fc receptor-like B (FCRLB), mRNA [NM_001002901]                                                                                                                  |
| SLC22A4 | 2.5 | Homo sapiens solute carrier family 22 (organic cation/ergothioneine transporter), member 4 (SLC22A4), mRNA [NM_003059]                                                        |
| IMMT    | 2.5 | Homo sapiens inner membrane protein, mitochondrial (mitofilin) (IMMT), nuclear gene encoding mitochondrial protein, transcript variant 1, mRNA [NM_006839]                    |
| AKAP10  | 2.5 | Homo sapiens A kinase (PKA) anchor protein 10 (AKAP10), nuclear gene encoding mitochondrial protein, mRNA [NM_007202]                                                         |
| SFXN2   | 2.5 | Homo sapiens sideroflexin 2 (SFXN2), mRNA [NM_178858]                                                                                                                         |
| METTL9  | 2.5 | Homo sapiens methyltransferase like 9 (METTL9), transcript variant 1, mRNA [NM_016025]                                                                                        |
| IL6ST   | 2.5 | Homo sapiens interleukin 6 signal transducer (gp130, oncostatin M receptor) (IL6ST), transcript variant 2, mRNA [NM_175767]                                                   |
| ESCO1   | 2.5 | Homo sapiens establishment of cohesion 1 homolog 1 (S. cerevisiae) (ESCO1), mRNA [NM_052911]                                                                                  |
| HOXC8   | 2.5 | Homo sapiens homeobox C8 (HOXC8), mRNA [NM_022658]                                                                                                                            |
| MAT2A   | 2.5 | Homo sapiens methionine adenosyltransferase II, alpha (MAT2A), mRNA [NM_005911]                                                                                               |
| CHST10  | 2.5 | Homo sapiens carbohydrate sulfotransferase 10 (CHST10), mRNA [NM_004854]                                                                                                      |
| FGFRL1  | 2.5 | Homo sapiens fibroblast growth factor receptor-like 1 (FGFRL1), transcript variant 1, mRNA [NM_001004356]                                                                     |
| AUTS2   | 2.5 | Homo sapiens autism susceptibility candidate 2 (AUTS2), transcript variant 1, mRNA [NM_015570]                                                                                |
| DCUN1D4 | 2.5 | Homo sapiens DCN1, defective in cullin neddylation 1, domain containing 4 (S. cerevisiae) (DCUN1D4), transcript variant 1, mRNA [NM_001040402]                                |
| XBP1    | 2.5 | Homo sapiens X-box binding protein 1 (XBP1), transcript variant 1, mRNA [NM_005080]                                                                                           |
| ARHGAP5 | 2.5 | Homo sapiens Rho GTPase activating protein 5 (ARHGAP5), transcript variant 1, mRNA [NM_001030055]                                                                             |

|         |     |                                                                                                                                         |
|---------|-----|-----------------------------------------------------------------------------------------------------------------------------------------|
| LYZL2   | 2.5 | Homo sapiens lysozyme-like 2 (LYZL2), mRNA [NM_183058]                                                                                  |
| TMEM2   | 2.5 | Homo sapiens transmembrane protein 2 (TMEM2), transcript variant 1, mRNA [NM_013390]                                                    |
| LARP1B  | 2.5 | Homo sapiens La ribonucleoprotein domain family, member 1B (LARP1B), transcript variant 1, mRNA [NM_018078]                             |
| RRP1B   | 2.4 | Homo sapiens ribosomal RNA processing 1 homolog B ( <i>S. cerevisiae</i> ) (RRP1B), mRNA [NM_015056]                                    |
| SLC6A9  | 2.4 | Homo sapiens solute carrier family 6 (neurotransmitter transporter, glycine), member 9 (SLC6A9), transcript variant 2, mRNA [NM_201649] |
| ZNF25   | 2.4 | Homo sapiens zinc finger protein 25 (ZNF25), mRNA [NM_145011]                                                                           |
| PEX5    | 2.4 | Homo sapiens peroxisomal biogenesis factor 5 (PEX5), transcript variant 2, mRNA [NM_000319]                                             |
| ANXA1   | 2.4 | Homo sapiens annexin A1 (ANXA1), mRNA [NM_000700]                                                                                       |
| FBXL17  | 2.4 | Homo sapiens F-box and leucine-rich repeat protein 17, mRNA (cDNA clone IMAGE:30341140), with apparent retained intron. [BC063316]      |
| SLC38A2 | 2.4 | Homo sapiens solute carrier family 38, member 2 (SLC38A2), mRNA [NM_018976]                                                             |
| DKC1    | 2.4 | Homo sapiens dyskeratosis congenita 1, dyskerin (DKC1), transcript variant 1, mRNA [NM_001363]                                          |
| UGT2B15 | 2.4 | Homo sapiens UDP glucuronosyltransferase 2 family, polypeptide B15 (UGT2B15), mRNA [NM_001076]                                          |
| ZNF45   | 2.4 | Homo sapiens zinc finger protein 45 (ZNF45), mRNA [NM_003425]                                                                           |
| SLC7A1  | 2.4 | Homo sapiens solute carrier family 7 (cationic amino acid transporter, y+ system), member 1 (SLC7A1), mRNA [NM_003045]                  |
| UGCG    | 2.4 | Homo sapiens UDP-glucose ceramide glucosyltransferase (UGCG), mRNA [NM_003358]                                                          |
| UTP14A  | 2.4 | Homo sapiens UTP14, U3 small nucleolar ribonucleoprotein, homolog A (yeast) (UTP14A), transcript variant 1, mRNA [NM_006649]            |
| CDKL1   | 2.4 | Homo sapiens cyclin-dependent kinase-like 1 (CDC2-related kinase) (CDKL1), mRNA [NM_004196]                                             |
| RDX     | 2.4 | Homo sapiens radixin (RDX), mRNA [NM_002906]                                                                                            |
| CHAC1   | 2.4 | Homo sapiens ChaC, cation transport regulator homolog 1 ( <i>E. coli</i> ) (CHAC1), transcript variant 1, mRNA [NM_024111]              |
| LRP12   | 2.4 | Homo sapiens low density lipoprotein-related protein 12 (LRP12), transcript variant 1, mRNA [NM_013437]                                 |
| SDK1    | 2.4 | Homo sapiens sidekick homolog 1, cell adhesion molecule (chicken) (SDK1), transcript variant 1, mRNA [NM_152744]                        |
| GALNT2  | 2.4 | Homo sapiens UDP-N-acetyl-alpha-D-galactosamine:polypeptide N-acetylgalactosaminyltransferase 2 (GalNAc-T2) (GALNT2), mRNA [NM_004481]  |
| LSM3    | 2.4 | U6 snRNA-associated Sm-like protein LSM3 [Source:UniProtKB/Swiss-Prot;Acc:P62310] [ENST00000306024]                                     |
| HPDL    | 2.4 | Homo sapiens 4-hydroxyphenylpyruvate dioxygenase-like (HPDL), mRNA [NM_032756]                                                          |
| RRN3    | 2.4 | Homo sapiens RRN3 RNA polymerase I transcription factor homolog ( <i>S. cerevisiae</i> ) (RRN3), mRNA [NM_018427]                       |
| ANXA13  | 2.4 | Homo sapiens annexin A13 (ANXA13), transcript variant 2, mRNA [NM_001003954]                                                            |
| URB1    | 2.4 | Homo sapiens URB1 ribosome biogenesis 1 homolog ( <i>S. cerevisiae</i> ) (URB1), mRNA [NM_014825]                                       |
| PRPF4B  | 2.4 | Homo sapiens PRP4 pre-mRNA processing factor 4 homolog B (yeast) (PRPF4B), mRNA [NM_003913]                                             |
| FTSJD1  | 2.4 | Homo sapiens FtsJ methyltransferase domain containing 1 (FTSJD1), transcript variant 1, mRNA [NM_018348]                                |
| EHBP1   | 2.4 | Homo sapiens EH domain binding protein 1 (EHBP1), transcript variant 1, mRNA [NM_015252]                                                |
| CELSR2  | 2.4 | Homo sapiens cadherin, EGF LAG seven-pass G-type receptor 2 (flamingo homolog, <i>Drosophila</i> ) (CELSR2), mRNA [NM_001408]           |
| GOLM1   | 2.4 | Homo sapiens golgi membrane protein 1 (GOLM1), transcript variant 1, mRNA [NM_016548]                                                   |
| ZNF544  | 2.4 | Homo sapiens zinc finger protein 544 (ZNF544), mRNA [NM_014480]                                                                         |
| UACA    | 2.4 | Homo sapiens uveal autoantigen with coiled-coil domains and ankyrin repeats (UACA), transcript variant 2, mRNA [NM_001008224]           |
| DFFB    | 2.4 | Homo sapiens DNA fragmentation factor, 40kDa, beta polypeptide (caspase-activated DNase) (DFFB), mRNA [NM_004402]                       |
| ZNF248  | 2.4 | Homo sapiens zinc finger protein 248 (ZNF248), mRNA [NM_021045]                                                                         |
| HECTD3  | 2.4 | Homo sapiens HECT domain containing 3 (HECTD3), mRNA [NM_024602]                                                                        |
| GIN1    | 2.4 | Homo sapiens gypsy retrotransposon integrase 1 (GIN1), mRNA [NM_017676]                                                                 |
| RAB39B  | 2.4 | Homo sapiens RAB39B, member RAS oncogene family (RAB39B), mRNA [NM_171998]                                                              |
| ETS2    | 2.4 | Homo sapiens v-ets erythroblastosis virus E26 oncogene homolog 2 (avian) (ETS2), mRNA [NM_005239]                                       |
| AMPD2   | 2.4 | Homo sapiens adenosine monophosphate deaminase 2 (isoform L) (AMPD2), transcript variant 1, mRNA [NM_004037]                            |

|           |     |                                                                                                                                                                                                                                                                                     |
|-----------|-----|-------------------------------------------------------------------------------------------------------------------------------------------------------------------------------------------------------------------------------------------------------------------------------------|
| CASP8     | 2.4 | Homo sapiens caspase 8, apoptosis-related cysteine peptidase (CASP8), transcript variant E, mRNA [NM_033358]                                                                                                                                                                        |
| FARSB     | 2.4 | Homo sapiens phenylalanyl-tRNA synthetase, beta subunit (FARSB), mRNA [NM_005687]                                                                                                                                                                                                   |
| WDR51B    | 2.4 | Homo sapiens WD repeat domain 51B (WDR51B), mRNA [NM_172240]                                                                                                                                                                                                                        |
| TIPARP    | 2.4 | Homo sapiens TCDD-inducible poly(ADP-ribose) polymerase (TIPARP), mRNA [NM_015508]                                                                                                                                                                                                  |
| PAN3      | 2.4 | Homo sapiens PAN3 poly(A) specific ribonuclease subunit homolog ( <i>S. cerevisiae</i> ) (PAN3), mRNA [NM_175854]                                                                                                                                                                   |
| IPO5      | 2.4 | Homo sapiens importin 5 (IPO5), mRNA [NM_002271]                                                                                                                                                                                                                                    |
| METTL1    | 2.4 | Homo sapiens methyltransferase like 1 (METTL1), transcript variant 1, mRNA [NM_005371]                                                                                                                                                                                              |
| E2F4      | 2.4 | Homo sapiens E2F transcription factor 4, p107/p130-binding (E2F4), mRNA [NM_001950]                                                                                                                                                                                                 |
| INPP4B    | 2.4 | Homo sapiens inositol polyphosphate-4-phosphatase, type II, 105kDa (INPP4B), transcript variant 1, mRNA [NM_003866]                                                                                                                                                                 |
| XPO5      | 2.4 | Homo sapiens exportin 5 (XPO5), mRNA [NM_020750]                                                                                                                                                                                                                                    |
| OR4C6     | 2.4 | Homo sapiens olfactory receptor, family 4, subfamily C, member 6 (OR4C6), mRNA [NM_001004704]                                                                                                                                                                                       |
| LTV1      | 2.4 | Homo sapiens LTV1 homolog ( <i>S. cerevisiae</i> ) (LTV1), mRNA [NM_032860]                                                                                                                                                                                                         |
| GOLT1B    | 2.4 | Homo sapiens golgi transport 1 homolog B ( <i>S. cerevisiae</i> ) (GOLT1B), mRNA [NM_016072]                                                                                                                                                                                        |
| ZNF513    | 2.4 | Homo sapiens zinc finger protein 513 (ZNF513), mRNA [NM_144631]                                                                                                                                                                                                                     |
| RPRML     | 2.4 | Homo sapiens reprimin-like (RPRML), mRNA [NM_203400]                                                                                                                                                                                                                                |
| EXOC6     | 2.4 | Homo sapiens exocyst complex component 6 (EXOC6), transcript variant 1, mRNA [NM_019053]                                                                                                                                                                                            |
| ST8SIA6   | 2.3 | Homo sapiens ST8 alpha-N-acetyl-neuraminidase alpha-2,8-sialyltransferase 6 (ST8SIA6), mRNA [NM_001004470]                                                                                                                                                                          |
| HIVEP3    | 2.3 | Transcription factor HIVEP3 (Human immunodeficiency virus type I enhancer-binding protein 3)(Kappa-B and V(D)J recombination signal sequences-binding protein)(Zinc finger protein ZAS3)(Kappa-binding protein 1)(KBP-1) [Source:UniProtKB/Swiss-Prot;Acc:Q5T1R4] [ENST00000372583] |
| PIBF1     | 2.3 | Homo sapiens progesterone immunomodulatory binding factor 1 (PIBF1), mRNA [NM_006346]                                                                                                                                                                                               |
| PHLDA1    | 2.3 | Homo sapiens pleckstrin homology-like domain, family A, member 1 (PHLDA1), mRNA [NM_007350]                                                                                                                                                                                         |
| ZP3       | 2.3 | Homo sapiens zona pellucida glycoprotein 3 (sperm receptor) (ZP3), transcript variant 2, mRNA [NM_007155]                                                                                                                                                                           |
| ATM       | 2.3 | Homo sapiens ataxia telangiectasia mutated (ATM), transcript variant 1, mRNA [NM_000051]                                                                                                                                                                                            |
| MANEA     | 2.3 | Homo sapiens mannosidase, endo-alpha (MANEA), mRNA [NM_024641]                                                                                                                                                                                                                      |
| MARS2     | 2.3 | Homo sapiens methionyl-tRNA synthetase 2, mitochondrial (MARS2), nuclear gene encoding mitochondrial protein, mRNA [NM_138395]                                                                                                                                                      |
| CAV1      | 2.3 | Homo sapiens caveolin 1, caveolae protein, 22kDa (CAV1), mRNA [NM_001753]                                                                                                                                                                                                           |
| ZNF121    | 2.3 | Homo sapiens zinc finger protein 121 (ZNF121), mRNA [NM_001008727]                                                                                                                                                                                                                  |
| KRTAP21-1 | 2.3 | Homo sapiens keratin associated protein 21-1 (KRTAP21-1), mRNA [NM_181619]                                                                                                                                                                                                          |
| PFKFB3    | 2.3 | Homo sapiens 6-phosphofructo-2-kinase/fructose-2,6-biphosphatase 3 (PFKFB3), transcript variant 1, mRNA [NM_004566]                                                                                                                                                                 |
| RPS6KC1   | 2.3 | Homo sapiens ribosomal protein S6 kinase, 52kDa, polypeptide 1 (RPS6KC1), transcript variant 1, mRNA [NM_012424]                                                                                                                                                                    |
| HNMT      | 2.3 | Homo sapiens histamine N-methyltransferase (HNMT), transcript variant 1, mRNA [NM_006895]                                                                                                                                                                                           |
| KLB       | 2.3 | Homo sapiens klotho beta (KLB), mRNA [NM_175737]                                                                                                                                                                                                                                    |
| LMAN1     | 2.3 | Homo sapiens lectin, mannose-binding, 1 (LMAN1), mRNA [NM_005570]                                                                                                                                                                                                                   |
| SLC12A8   | 2.3 | Homo sapiens solute carrier family 12 (potassium/chloride transporters), member 8 (SLC12A8), mRNA [NM_024628]                                                                                                                                                                       |
| IL6ST     | 2.3 | Homo sapiens interleukin 6 signal transducer (gp130, oncostatin M receptor) (IL6ST), transcript variant 2, mRNA [NM_175767]                                                                                                                                                         |
| XPO5      | 2.3 | Homo sapiens exportin 5 (XPO5), mRNA [NM_020750]                                                                                                                                                                                                                                    |
| PTP4A1    | 2.3 | Homo sapiens protein tyrosine phosphatase type IVA, member 1 (PTP4A1), mRNA [NM_003463]                                                                                                                                                                                             |
| VIM       | 2.3 | Homo sapiens vimentin (VIM), mRNA [NM_003380]                                                                                                                                                                                                                                       |
| SACS      | 2.3 | Homo sapiens spastic ataxia of Charlevoix-Saguenay (sacsin) (SACS), mRNA [NM_014363]                                                                                                                                                                                                |
| FST       | 2.3 | Homo sapiens follistatin (FST), transcript variant FST344, mRNA [NM_013409]                                                                                                                                                                                                         |
| LONRF2    | 2.3 | Homo sapiens LON peptidase N-terminal domain and ring finger 2 (LONRF2), mRNA [NM_198461]                                                                                                                                                                                           |
| AKR1C3    | 2.3 | Homo sapiens aldo-keto reductase family 1, member C3 (3-alpha hydroxysteroid dehydrogenase, type II) (AKR1C3), mRNA [NM_003739]                                                                                                                                                     |

|          |     |                                                                                                                     |
|----------|-----|---------------------------------------------------------------------------------------------------------------------|
| MAP7D3   | 2.3 | MAP7 domain-containing protein 3 [Source:UniProtKB/Swiss-Prot;Acc:Q8IWC1] [ENST00000316077]                         |
| CD44     | 2.3 | Homo sapiens CD44 molecule (Indian blood group) (CD44), transcript variant 1, mRNA [NM_000610]                      |
| ACER3    | 2.3 | Homo sapiens alkaline ceramidase 3 (ACER3), mRNA [NM_018367]                                                        |
| SPATA13  | 2.3 | Homo sapiens spermatogenesis associated 13 (SPATA13), transcript variant 1, mRNA [NM_001166271]                     |
| ARID5A   | 2.3 | Homo sapiens AT rich interactive domain 5A (MRF1-like) (ARID5A), mRNA [NM_212481]                                   |
| CRISP2   | 2.3 | Homo sapiens cysteine-rich secretory protein 2 (CRISP2), transcript variant 1, mRNA [NM_003296]                     |
| IRS1     | 2.3 | Homo sapiens insulin receptor substrate 1 (IRS1), mRNA [NM_005544]                                                  |
| FAM156B  | 2.3 | Homo sapiens family with sequence similarity 156, member B (FAM156B), mRNA [NM_001099684]                           |
| PPARGC1B | 2.3 | Homo sapiens peroxisome proliferator-activated receptor gamma, coactivator 1 beta (PPARGC1B), mRNA [NM_133263]      |
| S1PR4    | 2.3 | Homo sapiens sphingosine-1-phosphate receptor 4 (S1PR4), mRNA [NM_003775]                                           |
| UBA6     | 2.3 | Homo sapiens ubiquitin-like modifier activating enzyme 6 (UBA6), mRNA [NM_018227]                                   |
| ESF1     | 2.3 | Homo sapiens ESF1, nucleolar pre-rRNA processing protein, homolog ( <i>S. cerevisiae</i> ) (ESF1), mRNA [NM_016649] |
| DHX33    | 2.3 | Homo sapiens DEAH (Asp-Glu-Ala-His) box polypeptide 33 (DHX33), mRNA [NM_020162]                                    |
| TUBE1    | 2.3 | Homo sapiens tubulin, epsilon 1 (TUBE1), mRNA [NM_016262]                                                           |
| UST      | 2.3 | Homo sapiens uronyl-2-sulfotransferase (UST), mRNA [NM_005715]                                                      |
| PDCD11   | 2.3 | Homo sapiens programmed cell death 11 (PDCD11), mRNA [NM_014976]                                                    |
| HLF      | 2.3 | Homo sapiens hepatic leukemia factor (HLF), mRNA [NM_002126]                                                        |
| RNPS1    | 2.3 | Homo sapiens RNA binding protein S1, serine-rich domain (RNPS1), transcript variant 1, mRNA [NM_006711]             |
| ERRFI1   | 2.3 | Homo sapiens ERBB receptor feedback inhibitor 1 (ERRFI1), mRNA [NM_018948]                                          |
| ZBTB33   | 2.3 | Homo sapiens zinc finger and BTB domain containing 33 (ZBTB33), mRNA [NM_006777]                                    |
| AGFG1    | 2.3 | Homo sapiens ArfGAP with FG repeats 1 (AGFG1), transcript variant 1, mRNA [NM_001135187]                            |
| PGAM2    | 2.3 | Homo sapiens phosphoglycerate mutase 2 (muscle) (PGAM2), mRNA [NM_000290]                                           |
| WISP2    | 2.3 | Homo sapiens WNT1 inducible signaling pathway protein 2 (WISP2), mRNA [NM_003881]                                   |
| PLAA     | 2.3 | Homo sapiens phospholipase A2-activating protein (PLAA), mRNA [NM_001031689]                                        |
| TBL3     | 2.3 | Homo sapiens transducin (beta)-like 3 (TBL3), mRNA [NM_006453]                                                      |
| NOL8     | 2.3 | Homo sapiens nucleolar protein 8 (NOL8), transcript variant 1, mRNA [NM_017948]                                     |
| GPRC5A   | 2.3 | Homo sapiens G protein-coupled receptor, family C, group 5, member A (GPRC5A), mRNA [NM_003979]                     |
| ERI2     | 2.3 | Homo sapiens ERI1 exoribonuclease family member 2 (ERI2), transcript variant 1, mRNA [NM_001142725]                 |
| DPH3     | 2.3 | Homo sapiens DPH3, KTI11 homolog ( <i>S. cerevisiae</i> ) (DPH3), transcript variant 1, mRNA [NM_206831]            |
| DHRS3    | 2.3 | Homo sapiens dehydrogenase/reductase (SDR family) member 3 (DHRS3), mRNA [NM_004753]                                |
| IGFL2    | 2.3 | Homo sapiens cDNA FLJ43766 fis, clone TESTI2049246. [AK125754]                                                      |
| ZNF222   | 2.3 | Homo sapiens zinc finger protein 222 (ZNF222), transcript variant 2, mRNA [NM_013360]                               |
| CASP8AP2 | 2.3 | Homo sapiens caspase 8 associated protein 2 (CASP8AP2), transcript variant 1, mRNA [NM_012115]                      |
| RRS1     | 2.3 | Homo sapiens RRS1 ribosome biogenesis regulator homolog ( <i>S. cerevisiae</i> ) (RRS1), mRNA [NM_015169]           |
| ECE1     | 2.3 | Homo sapiens endothelin converting enzyme 1 (ECE1), transcript variant 1, mRNA [NM_001397]                          |
| JAK2     | 2.3 | Homo sapiens Janus kinase 2 (JAK2), mRNA [NM_004972]                                                                |
| AUTS2    | 2.3 | Homo sapiens autism susceptibility candidate 2 (AUTS2), transcript variant 3, mRNA [NM_001127232]                   |
| OTUD4    | 2.3 | Homo sapiens OTU domain containing 4 (OTUD4), transcript variant 1, mRNA [NM_199324]                                |
| PAN3     | 2.3 | Homo sapiens PAN3 poly(A) specific ribonuclease subunit homolog ( <i>S. cerevisiae</i> ) (PAN3), mRNA [NM_175854]   |
| MCOLN2   | 2.3 | Homo sapiens mucolipin 2 (MCOLN2), mRNA [NM_153259]                                                                 |
| C6orf162 | 2.3 | Homo sapiens chromosome 6 open reading frame 162 (C6orf162), transcript variant 1, mRNA [NM_001042493]              |
| MYOF     | 2.3 | Homo sapiens myoferlin (MYOF), transcript variant 2, mRNA [NM_133337]                                               |
| PRR3     | 2.3 | Homo sapiens proline rich 3 (PRR3), transcript variant 1, mRNA [NM_025263]                                          |

|           |     |                                                                                                                      |
|-----------|-----|----------------------------------------------------------------------------------------------------------------------|
| KCNK6     | 2.2 | Homo sapiens potassium channel, subfamily K, member 6 (KCNK6), mRNA [NM_004823]                                      |
| ZNF23     | 2.2 | Homo sapiens zinc finger protein 23 (KOX 16) (ZNF23), mRNA [NM_145911]                                               |
| RASAL2    | 2.2 | Homo sapiens RAS protein activator like 2 (RASAL2), transcript variant 2, mRNA [NM_170692]                           |
| PCM1      | 2.2 | Homo sapiens pericentriolar material 1 (PCM1), mRNA [NM_006197]                                                      |
| PLD6      | 2.2 | Homo sapiens phospholipase D family, member 6 (PLD6), mRNA [NM_178836]                                               |
| PAK1IP1   | 2.2 | Homo sapiens PAK1 interacting protein 1 (PAK1IP1), mRNA [NM_017906]                                                  |
| ANO2      | 2.2 | Homo sapiens anoctamin 2 (ANO2), mRNA [NM_020373]                                                                    |
| ZNF462    | 2.2 | Homo sapiens zinc finger protein 462 (ZNF462), mRNA [NM_021224]                                                      |
| EIF1AX    | 2.2 | Homo sapiens eukaryotic translation initiation factor 1A, X-linked (EIF1AX), mRNA [NM_001412]                        |
| TFF1      | 2.2 | Homo sapiens trefoil factor 1 (TFF1), mRNA [NM_003225]                                                               |
| TMEM18    | 2.2 | Homo sapiens transmembrane protein 18 (TMEM18), mRNA [NM_152834]                                                     |
| SON       | 2.2 | Homo sapiens SON DNA binding protein (SON), transcript variant b, mRNA [NM_032195]                                   |
| NBN       | 2.2 | Homo sapiens nibrin (NBN), mRNA [NM_002485]                                                                          |
| ZKSCAN5   | 2.2 | Homo sapiens zinc finger with KRAB and SCAN domains 5 (ZKSCAN5), transcript variant 1, mRNA [NM_014569]              |
| BEND3     | 2.2 | Homo sapiens BEN domain containing 3 (BEND3), mRNA [NM_001080450]                                                    |
| AOX1      | 2.2 | Homo sapiens aldehyde oxidase 1 (AOX1), mRNA [NM_001159]                                                             |
| MCOLN3    | 2.2 | Homo sapiens mucolipin 3 (MCOLN3), mRNA [NM_018298]                                                                  |
| POLR3F    | 2.2 | Homo sapiens polymerase (RNA) III (DNA directed) polypeptide F, 39 kDa (POLR3F), mRNA [NM_006466]                    |
| IMPACT    | 2.2 | Homo sapiens Impact homolog (mouse) (IMPACT), mRNA [NM_018439]                                                       |
| NHEJ1     | 2.2 | Homo sapiens nonhomologous end-joining factor 1 (NHEJ1), mRNA [NM_024782]                                            |
| PCDHA11   | 2.2 | Homo sapiens protocadherin alpha 11 (PCDHA11), transcript variant 2, mRNA [NM_031861]                                |
| KRTAP10-4 | 2.2 | Homo sapiens keratin associated protein 10-4 (KRTAP10-4), mRNA [NM_198687]                                           |
| GLUL      | 2.2 | Homo sapiens glutamate-ammonia ligase (glutamine synthetase) (GLUL), transcript variant 1, mRNA [NM_002065]          |
| QSOX2     | 2.2 | Homo sapiens quiescinc Q6 sulfhydryl oxidase 2 (QSOX2), mRNA [NM_181701]                                             |
| UNC13B    | 2.2 | Homo sapiens unc-13 homolog B (C. elegans) (UNC13B), mRNA [NM_006377]                                                |
| POLR1D    | 2.2 | Homo sapiens polymerase (RNA) I polypeptide D, 16kDa (POLR1D), transcript variant 2, mRNA [NM_152705]                |
| ADAMTS17  | 2.2 | Homo sapiens ADAM metalloproteinase with thrombospondin type 1 motif, 17 (ADAMTS17), mRNA [NM_139057]                |
| PARP6     | 2.2 | Homo sapiens poly (ADP-ribose) polymerase family, member 6 (PARP6), mRNA [NM_020214]                                 |
| SNX9      | 2.2 | Homo sapiens sorting nexin 9 (SNX9), mRNA [NM_016224]                                                                |
| FLNB      | 2.2 | Homo sapiens filamin B, beta (FLNB), transcript variant 2, mRNA [NM_001457]                                          |
| MYPN      | 2.2 | Homo sapiens myopalladin (MYPN), mRNA [NM_032578]                                                                    |
| GPX8      | 2.2 | Homo sapiens glutathione peroxidase 8 (putative) (GPX8), mRNA [NM_001008397]                                         |
| ZNF627    | 2.2 | Homo sapiens zinc finger protein 627 (ZNF627), mRNA [NM_145295]                                                      |
| FAIM3     | 2.2 | Homo sapiens Fas apoptotic inhibitory molecule 3 (FAIM3), transcript variant 1, mRNA [NM_005449]                     |
| ZNF813    | 2.2 | Homo sapiens zinc finger protein 813 (ZNF813), mRNA [NM_001004301]                                                   |
| SLC30A7   | 2.2 | Homo sapiens solute carrier family 30 (zinc transporter), member 7 (SLC30A7), transcript variant 1, mRNA [NM_133496] |
| ZNF799    | 2.2 | Homo sapiens zinc finger protein 799 (ZNF799), mRNA [NM_001080821]                                                   |
| NOP16     | 2.2 | Homo sapiens NOP16 nucleolar protein homolog (yeast) (NOP16), mRNA [NM_016391]                                       |
| PADI2     | 2.2 | Homo sapiens peptidyl arginine deiminase, type II (PADI2), mRNA [NM_007365]                                          |
| CCDC112   | 2.2 | Homo sapiens coiled-coil domain containing 112 (CCDC112), transcript variant 2, mRNA [NM_152549]                     |
| SUSD4     | 2.2 | Homo sapiens sushi domain containing 4 (SUSD4), transcript variant 2, mRNA [NM_001037175]                            |
| SPIN3     | 2.2 | Homo sapiens spindlin family, member 3 (SPIN3), transcript variant 1, mRNA [NM_001010862]                            |
| ALS2      | 2.2 | Homo sapiens amyotrophic lateral sclerosis 2 (juvenile) (ALS2), transcript variant 2, mRNA [NM_001135745]            |

|          |     |                                                                                                                                                       |
|----------|-----|-------------------------------------------------------------------------------------------------------------------------------------------------------|
| ZBTB9    | 2.2 | Homo sapiens zinc finger and BTB domain containing 9 (ZBTB9), mRNA [NM_152735]                                                                        |
| RNF14    | 2.2 | Homo sapiens ring finger protein 14 (RNF14), transcript variant 1, mRNA [NM_004290]                                                                   |
| BTAF1    | 2.2 | Homo sapiens BTAF1 RNA polymerase II, B-TFIID transcription factor-associated, 170kDa (Mot1 homolog, <i>S. cerevisiae</i> ) (BTAF1), mRNA [NM_003972] |
| OXER1    | 2.2 | Homo sapiens oxoecicosanoid (OXE) receptor 1 (OXER1), mRNA [NM_148962]                                                                                |
| TSEN2    | 2.2 | Homo sapiens tRNA splicing endonuclease 2 homolog ( <i>S. cerevisiae</i> ) (TSEN2), transcript variant 1, mRNA [NM_025265]                            |
| MBLAC2   | 2.2 | Homo sapiens metallo-beta-lactamase domain containing 2 (MBLAC2), mRNA [NM_203406]                                                                    |
| ARPP19   | 2.2 | Homo sapiens cAMP-regulated phosphoprotein, 19kDa (ARPP19), mRNA [NM_006628]                                                                          |
| NOP2     | 2.2 | Homo sapiens NOP2 nucleolar protein homolog (yeast) (NOP2), transcript variant 2, mRNA [NM_001033714]                                                 |
| OXNAD1   | 2.2 | Homo sapiens oxidoreductase NAD-binding domain containing 1 (OXNAD1), mRNA [NM_138381]                                                                |
| SPIN1    | 2.2 | Homo sapiens spindlin 1 (SPIN1), mRNA [NM_006717]                                                                                                     |
| RRP9     | 2.2 | Homo sapiens ribosomal RNA processing 9, small subunit (SSU) processome component, homolog (yeast) (RRP9), mRNA [NM_004704]                           |
| GLDN     | 2.2 | Homo sapiens gliomedin (GLDN), mRNA [NM_181789]                                                                                                       |
| DYRK3    | 2.2 | Homo sapiens dual-specificity tyrosine-(Y)-phosphorylation regulated kinase 3 (DYRK3), transcript variant 2, mRNA [NM_001004023]                      |
| ROR1     | 2.2 | Homo sapiens receptor tyrosine kinase-like orphan receptor 1 (ROR1), transcript variant 1, mRNA [NM_005012]                                           |
| TSGA10   | 2.2 | Homo sapiens testis specific, 10 (TSGA10), transcript variant 1, mRNA [NM_025244]                                                                     |
| SLC9A3R1 | 2.2 | Homo sapiens solute carrier family 9 (sodium/hydrogen exchanger), member 3 regulator 1 (SLC9A3R1), mRNA [NM_004252]                                   |
| PRMT5    | 2.2 | Homo sapiens protein arginine methyltransferase 5 (PRMT5), transcript variant 2, mRNA [NM_001039619]                                                  |
| AKAP1    | 2.2 | Homo sapiens A kinase (PRKA) anchor protein 1 (AKAP1), nuclear gene encoding mitochondrial protein, mRNA [NM_003488]                                  |
| EMR2     | 2.2 | Homo sapiens egf-like module containing, mucin-like, hormone receptor-like 2 (EMR2), transcript variant 1, mRNA [NM_013447]                           |
| EEF1A1   | 2.2 | Homo sapiens eukaryotic translation elongation factor 1 alpha 1 (EEF1A1), mRNA [NM_001402]                                                            |
| NFE2L2   | 2.2 | Homo sapiens nuclear factor (erythroid-derived 2)-like 2 (NFE2L2), transcript variant 1, mRNA [NM_006164]                                             |
| ELK1     | 2.2 | Homo sapiens ELK1, member of ETS oncogene family (ELK1), transcript variant 2, mRNA [NM_005229]                                                       |
| GRPEL2   | 2.2 | Homo sapiens GrpE-like 2, mitochondrial ( <i>E. coli</i> ) (GRPEL2), nuclear gene encoding mitochondrial protein, mRNA [NM_152407]                    |
| PNO1     | 2.2 | Homo sapiens partner of NOB1 homolog ( <i>S. cerevisiae</i> ) (PNO1), mRNA [NM_020143]                                                                |
| RNF44    | 2.2 | Homo sapiens ring finger protein 44 (RNF44), mRNA [NM_014901]                                                                                         |
| TCP1     | 2.2 | Homo sapiens t-complex 1 (TCP1), transcript variant 1, mRNA [NM_030752]                                                                               |
| UTP20    | 2.2 | Homo sapiens UTP20, small subunit (SSU) processome component, homolog (yeast) (UTP20), mRNA [NM_014503]                                               |
| EPS15L1  | 2.2 | Homo sapiens epidermal growth factor receptor pathway substrate 15-like 1 (EPS15L1), mRNA [NM_021235]                                                 |
| NUS1     | 2.2 | Homo sapiens nuclear undecaprenyl pyrophosphate synthase 1 homolog ( <i>S. cerevisiae</i> ) (NUS1), mRNA [NM_138459]                                  |
| TSPO2    | 2.2 | Homo sapiens translocator protein 2 (TSPO2), transcript variant 1, mRNA [NM_001010873]                                                                |
| FAM123B  | 2.2 | Homo sapiens family with sequence similarity 123B (FAM123B), mRNA [NM_152424]                                                                         |
| MORC2    | 2.2 | Homo sapiens MORC family CW-type zinc finger 2 (MORC2), mRNA [NM_014941]                                                                              |
| PNPT1    | 2.2 | Homo sapiens polyribonucleotide nucleotidyltransferase 1 (PNPT1), mRNA [NM_033109]                                                                    |
| CD163L1  | 2.2 | Homo sapiens CD163 molecule-like 1 (CD163L1), mRNA [NM_174941]                                                                                        |
| SLK      | 2.2 | Homo sapiens STE20-like kinase (yeast) (SLK), mRNA [NM_014720]                                                                                        |
| E2F6     | 2.2 | Homo sapiens E2F transcription factor 6 (E2F6), mRNA [NM_198256]                                                                                      |
| PVR      | 2.2 | Homo sapiens poliovirus receptor (PVR), transcript variant 1, mRNA [NM_006505]                                                                        |
| GTPBP10  | 2.2 | Homo sapiens GTP-binding protein 10 (putative) (GTPBP10), transcript variant 2, mRNA [NM_033107]                                                      |
| BARHL1   | 2.2 | Homo sapiens BarH-like homeobox 1 (BARHL1), mRNA [NM_020064]                                                                                          |
| SERINC3  | 2.1 | Homo sapiens serine incorporator 3 (SERINC3), transcript variant 2, mRNA [NM_198941]                                                                  |
| IFFO1    | 2.1 | Homo sapiens intermediate filament family orphan 1 (IFFO1), transcript variant 4, mRNA [NM_001039670]                                                 |
| ARF1     | 2.1 | Homo sapiens ADP-ribosylation factor 1 (ARF1), transcript variant 1, mRNA [NM_001024227]                                                              |

|          |     |                                                                                                                                                         |
|----------|-----|---------------------------------------------------------------------------------------------------------------------------------------------------------|
| TIAM1    | 2.1 | Homo sapiens T-cell lymphoma invasion and metastasis 1 (TIAM1), mRNA [NM_003253]                                                                        |
| L2HGDH   | 2.1 | Homo sapiens L-2-hydroxyglutarate dehydrogenase (L2HGDH), nuclear gene encoding mitochondrial protein, mRNA [NM_024884]                                 |
| PUS7     | 2.1 | Homo sapiens pseudouridylate synthase 7 homolog ( <i>S. cerevisiae</i> ) (PUS7), mRNA [NM_019042]                                                       |
| ZNF695   | 2.1 | Homo sapiens zinc finger protein 695 (ZNF695), mRNA [NM_020394]                                                                                         |
| GAD1     | 2.1 | Homo sapiens glutamate decarboxylase 1 (brain, 67kDa) (GAD1), transcript variant GAD25, mRNA [NM_013445]                                                |
| YARS     | 2.1 | Homo sapiens tyrosyl-tRNA synthetase (YARS), mRNA [NM_003680]                                                                                           |
| NOLC1    | 2.1 | Homo sapiens nucleolar and coiled-body phosphoprotein 1 (NOLC1), mRNA [NM_004741]                                                                       |
| AMD1     | 2.1 | Homo sapiens adenosylmethionine decarboxylase 1 (AMD1), transcript variant 1, mRNA [NM_001634]                                                          |
| GORAB    | 2.1 | Homo sapiens golgin, RAB6-interacting (GORAB), transcript variant 1, mRNA [NM_152281]                                                                   |
| SCAMP1   | 2.1 | Homo sapiens secretory carrier membrane protein 1 (SCAMP1), mRNA [NM_004866]                                                                            |
| PPAT     | 2.1 | Homo sapiens phosphoribosyl pyrophosphate amidotransferase (PPAT), mRNA [NM_002703]                                                                     |
| MYOF     | 2.1 | Homo sapiens myoferlin (MYOF), transcript variant 1, mRNA [NM_013451]                                                                                   |
| MKI67IP  | 2.1 | Homo sapiens MKI67 (FHA domain) interacting nucleolar phosphoprotein (MKI67IP), mRNA [NM_032390]                                                        |
| SPRED1   | 2.1 | Homo sapiens sprouty-related, EVH1 domain containing 1 (SPRED1), mRNA [NM_152594]                                                                       |
| HKR1     | 2.1 | Homo sapiens GLI-Kruppel family member HKR1 (HKR1), mRNA [NM_181786]                                                                                    |
| RAMP1    | 2.1 | Homo sapiens receptor (G protein-coupled) activity modifying protein 1 (RAMP1), mRNA [NM_005855]                                                        |
| ING3     | 2.1 | Homo sapiens inhibitor of growth family, member 3 (ING3), transcript variant 3, mRNA [NM_198267]                                                        |
| ZNF485   | 2.1 | Homo sapiens zinc finger protein 485 (ZNF485), mRNA [NM_145312]                                                                                         |
| RRP1     | 2.1 | Homo sapiens ribosomal RNA processing 1 homolog ( <i>S. cerevisiae</i> ) (RRP1), mRNA [NM_003683]                                                       |
| SHPRH    | 2.1 | Homo sapiens SNF2 histone linker PHD RING helicase (SHPRH), transcript variant 1, mRNA [NM_001042683]                                                   |
| CABC1    | 2.1 | Homo sapiens chaperone, ABC1 activity of bc1 complex homolog ( <i>S. pombe</i> ) (CABC1), nuclear gene encoding mitochondrial protein, mRNA [NM_020247] |
| MFAP3    | 2.1 | Homo sapiens microfibrillar-associated protein 3 (MFAP3), transcript variant 1, mRNA [NM_005927]                                                        |
| DDX18    | 2.1 | Homo sapiens DEAD (Asp-Glu-Ala-Asp) box polypeptide 18 (DDX18), mRNA [NM_006773]                                                                        |
| IKBIP    | 2.1 | Homo sapiens IKBKB interacting protein (IKBIP), transcript variant 1, mRNA [NM_153687]                                                                  |
| WDR75    | 2.1 | Homo sapiens WD repeat domain 75 (WDR75), mRNA [NM_032168]                                                                                              |
| THSD4    | 2.1 | Homo sapiens thrombospondin, type I, domain containing 4 (THSD4), mRNA [NM_024817]                                                                      |
| POLR1E   | 2.1 | Homo sapiens polymerase (RNA) I polypeptide E, 53kDa (POLR1E), mRNA [NM_022490]                                                                         |
| ANAPC7   | 2.1 | Homo sapiens anaphase promoting complex subunit 7 (ANAPC7), transcript variant 1, mRNA [NM_016238]                                                      |
| ZSCAN22  | 2.1 | Homo sapiens zinc finger and SCAN domain containing 22 (ZSCAN22), mRNA [NM_181846]                                                                      |
| CTNNA3   | 2.1 | Homo sapiens catenin (cadherin-associated protein), alpha 3 (CTNNA3), transcript variant 1, mRNA [NM_013266]                                            |
| KCNG4    | 2.1 | Homo sapiens potassium voltage-gated channel, subfamily G, member 4 (KCNG4), mRNA [NM_172347]                                                           |
| PIK3CA   | 2.1 | Homo sapiens phosphoinositide-3-kinase, catalytic, alpha polypeptide (PIK3CA), mRNA [NM_006218]                                                         |
| DOK1     | 2.1 | Homo sapiens docking protein 1, 62kDa (downstream of tyrosine kinase 1) (DOK1), mRNA [NM_001381]                                                        |
| PRKY     | 2.1 | Homo sapiens protein kinase, Y-linked (PRKY), non-coding RNA [NR_028062]                                                                                |
| FREQ     | 2.1 | Homo sapiens frequenin homolog ( <i>Drosophila</i> ) (FREQ), transcript variant 1, mRNA [NM_014286]                                                     |
| ZNF57    | 2.1 | Homo sapiens zinc finger protein 57 (ZNF57), mRNA [NM_173480]                                                                                           |
| WWP1     | 2.1 | Homo sapiens WW domain containing E3 ubiquitin protein ligase 1 (WWP1), mRNA [NM_007013]                                                                |
| RALGAPA2 | 2.1 | Homo sapiens Ral GTPase activating protein, alpha subunit 2 (catalytic) (RALGAPA2), mRNA [NM_020343]                                                    |
| TARDBP   | 2.1 | Homo sapiens TAR DNA binding protein (TARDBP), mRNA [NM_007375]                                                                                         |
| TLL1     | 2.1 | Homo sapiens tubulin tyrosine ligase-like family, member 11 (TLL1), transcript variant 2, mRNA [NM_194252]                                              |
| PRAGMIN  | 2.1 | Homo sapiens homolog of rat pragma of Rnd2 (PRAGMIN), mRNA [NM_001080826]                                                                               |
| ZNF354A  | 2.1 | Homo sapiens zinc finger protein 354A (ZNF354A), mRNA [NM_005649]                                                                                       |

|         |     |                                                                                                                                                  |
|---------|-----|--------------------------------------------------------------------------------------------------------------------------------------------------|
| GPATCH4 | 2.1 | Homo sapiens G patch domain containing 4 (GPATCH4), transcript variant 2, mRNA [NM_182679]                                                       |
| PRRC1   | 2.1 | Homo sapiens proline-rich coiled-coil 1 (PRRC1), mRNA [NM_130809]                                                                                |
| MKI67IP | 2.1 | Homo sapiens MKI67 (FHA domain) interacting nucleolar phosphoprotein (MKI67IP), mRNA [NM_032390]                                                 |
| HNRPDL  | 2.1 | Homo sapiens heterogeneous nuclear ribonucleoprotein D-like (HNRPDL), transcript variant 2, mRNA [NM_031372]                                     |
| MTHFD1L | 2.1 | Homo sapiens methylenetetrahydrofolate dehydrogenase (NADP+ dependent) 1-like (MTHFD1L), mRNA [NM_015440]                                        |
| WDR46   | 2.1 | Homo sapiens WD repeat domain 46 (WDR46), transcript variant 1, mRNA [NM_005452]                                                                 |
| MYBBP1A | 2.1 | Homo sapiens MYB binding protein (P160) 1a (MYBBP1A), transcript variant 2, mRNA [NM_014520]                                                     |
| GPR137C | 2.1 | Homo sapiens G protein-coupled receptor 137C (GPR137C), mRNA [NM_001099652]                                                                      |
| PRELID2 | 2.1 | Homo sapiens PRELI domain containing 2 (PRELID2), transcript variant 3, mRNA [NM_138492]                                                         |
| ADCY1   | 2.1 | Homo sapiens adenylate cyclase 1 (brain) (ADCY1), mRNA [NM_021116]                                                                               |
| NAB1    | 2.1 | Homo sapiens NGFI-A binding protein 1 (EGR1 binding protein 1) (NAB1), mRNA [NM_005966]                                                          |
| SDAD1   | 2.1 | Homo sapiens SDA1 domain containing 1 (SDAD1), mRNA [NM_018115]                                                                                  |
| MAFF    | 2.1 | Homo sapiens v-maf musculoaponeurotic fibrosarcoma oncogene homolog F (avian) (MAFF), transcript variant 1, mRNA [NM_012323]                     |
| SYT1    | 2.1 | Homo sapiens synaptotagmin I (SYT1), transcript variant 2, mRNA [NM_001135805]                                                                   |
| CTAGE4  | 2.1 | Homo sapiens CTAGE family, member 4 (CTAGE4), mRNA [NM_198495]                                                                                   |
| PTPN2   | 2.1 | Homo sapiens protein tyrosine phosphatase, non-receptor type 2 (PTPN2), transcript variant 1, mRNA [NM_002828]                                   |
| PTPRM   | 2.1 | Homo sapiens protein tyrosine phosphatase, receptor type, M (PTPRM), transcript variant 2, mRNA [NM_002845]                                      |
| STARD13 | 2.1 | Homo sapiens StAR-related lipid transfer (START) domain containing 13 (STARD13), transcript variant alpha, mRNA [NM_178006]                      |
| DNALI1  | 2.1 | Homo sapiens dynein, axonemal, light intermediate chain 1 (DNALI1), mRNA [NM_003462]                                                             |
| ZNF184  | 2.1 | Homo sapiens zinc finger protein 184 (ZNF184), mRNA [NM_007149]                                                                                  |
| CD3EAP  | 2.1 | Homo sapiens CD3e molecule, epsilon associated protein (CD3EAP), mRNA [NM_012099]                                                                |
| SLC6A6  | 2.1 | Homo sapiens solute carrier family 6 (neurotransmitter transporter, taurine), member 6 (SLC6A6), transcript variant 1, mRNA [NM_003043]          |
| ABCD3   | 2.1 | Homo sapiens ATP-binding cassette, sub-family D (ALD), member 3 (ABCD3), transcript variant 2, mRNA [NM_001122674]                               |
| PPRC1   | 2.1 | Homo sapiens peroxisome proliferator-activated receptor gamma, coactivator-related 1 (PPRC1), mRNA [NM_015062]                                   |
| IGFBP3  | 2.1 | Homo sapiens insulin-like growth factor binding protein 3 (IGFBP3), transcript variant 1, mRNA [NM_001013398]                                    |
| PCDHA6  | 2.1 | Homo sapiens protocadherin alpha 6 (PCDHA6), transcript variant 2, mRNA [NM_031848]                                                              |
| SFRS13A | 2.0 | Homo sapiens splicing factor, arginine/serine-rich 13A (SFRS13A), transcript variant 2, mRNA [NM_054016]                                         |
| MRRF    | 2.0 | Homo sapiens mitochondrial ribosome recycling factor (MRRF), nuclear gene encoding mitochondrial protein, transcript variant 2, mRNA [NM_199177] |
| PPIA    | 2.0 | Homo sapiens peptidylprolyl isomerase A (cyclophilin A) (PPIA), mRNA [NM_021130]                                                                 |
| CLDN14  | 2.0 | Homo sapiens claudin 14 (CLDN14), transcript variant 1, mRNA [NM_144492]                                                                         |
| ZNF518A | 2.0 | Homo sapiens zinc finger protein 518A (ZNF518A), mRNA [NM_014803]                                                                                |
| NDEL1   | 2.0 | Homo sapiens nudE nuclear distribution gene E homolog (A. nidulans)-like 1 (NDEL1), transcript variant 2, mRNA [NM_030808]                       |
| TREM2   | 2.0 | Homo sapiens triggering receptor expressed on myeloid cells 2 (TREM2), mRNA [NM_018965]                                                          |
| ACAD10  | 2.0 | Homo sapiens acyl-Coenzyme A dehydrogenase family, member 10 (ACAD10), transcript variant 2, mRNA [NM_025247]                                    |
| VPS8    | 2.0 | Homo sapiens vacuolar protein sorting 8 homolog (S. cerevisiae) (VPS8), transcript variant 1, mRNA [NM_001009921]                                |
| TFRC    | 2.0 | Homo sapiens transferrin receptor (p90, CD71) (TFRC), mRNA [NM_003234]                                                                           |
| AMFR    | 2.0 | Homo sapiens autocrine motility factor receptor (AMFR), mRNA [NM_001144]                                                                         |
| ANKIB1  | 2.0 | Homo sapiens ankyrin repeat and IBR domain containing 1 (ANKIB1), mRNA [NM_019004]                                                               |
| LRRC8B  | 2.0 | Homo sapiens leucine rich repeat containing 8 family, member B (LRRC8B), transcript variant 1, mRNA [NM_015350]                                  |
| POLR1C  | 2.0 | Homo sapiens polymerase (RNA) I polypeptide C, 30kDa (POLR1C), transcript variant 2, mRNA [NM_004875]                                            |
| UTP15   | 2.0 | Homo sapiens UTP15, U3 small nucleolar ribonucleoprotein, homolog (S. cerevisiae) (UTP15), mRNA [NM_032175]                                      |
| BATF2   | 2.0 | Homo sapiens basic leucine zipper transcription factor, ATF-like 2 (BATF2), mRNA [NM_138456]                                                     |



|         |     |                                                                                                                                                                |
|---------|-----|----------------------------------------------------------------------------------------------------------------------------------------------------------------|
| ZFX     | 2.0 | Homo sapiens zinc finger protein, X-linked (ZFX), mRNA [NM_003410]                                                                                             |
| BYSL    | 2.0 | Homo sapiens bystin-like (BYSL), mRNA [NM_004053]                                                                                                              |
| ATAD3C  | 2.0 | Homo sapiens ATPase family, AAA domain containing 3C (ATAD3C), mRNA [NM_001039211]                                                                             |
| TPBG    | 2.0 | Homo sapiens trophoblast glycoprotein (TPBG), transcript variant 1, mRNA [NM_006670]                                                                           |
| PRKAA1  | 2.0 | Homo sapiens protein kinase, AMP-activated, alpha 1 catalytic subunit (PRKAA1), transcript variant 2, mRNA [NM_206907]                                         |
| SETD2   | 2.0 | Homo sapiens SET domain containing 2 (SETD2), mRNA [NM_014159]                                                                                                 |
| PROKR2  | 2.0 | Homo sapiens prokineticin receptor 2 (PROKR2), mRNA [NM_144773]                                                                                                |
| ZNF84   | 2.0 | Homo sapiens zinc finger protein 84 (ZNF84), transcript variant 1, mRNA [NM_003428]                                                                            |
| PDCD6IP | 2.0 | Homo sapiens programmed cell death 6 interacting protein (PDCD6IP), transcript variant 1, mRNA [NM_013374]                                                     |
| PARP11  | 2.0 | Homo sapiens poly (ADP-ribose) polymerase family, member 11 (PARP11), mRNA [NM_020367]                                                                         |
| GFI1B   | 2.0 | Homo sapiens growth factor independent 1B transcription repressor (GFI1B), transcript variant 1, mRNA [NM_004188]                                              |
| GNL3    | 2.0 | Homo sapiens guanine nucleotide binding protein-like 3 (nucleolar) (GNL3), transcript variant 1, mRNA [NM_014366]                                              |
| GARS    | 2.0 | Homo sapiens glycyl-tRNA synthetase (GARS), mRNA [NM_002047]                                                                                                   |
| MAP6    | 2.0 | Homo sapiens microtubule-associated protein 6 (MAP6), transcript variant 1, mRNA [NM_033063]                                                                   |
| LGMN    | 2.0 | Homo sapiens legumin (LGMN), transcript variant 2, mRNA [NM_001008530]                                                                                         |
| FAM86A  | 2.0 | Homo sapiens family with sequence similarity 86, member A (FAM86A), transcript variant 1, mRNA [NM_201400]                                                     |
| HK2     | 2.0 | Homo sapiens hexokinase 2 (HK2), mRNA [NM_000189]                                                                                                              |
| ELK1    | 2.0 | Homo sapiens ELK1, member of ETS oncogene family (ELK1), transcript variant 1, mRNA [NM_001114123]                                                             |
| SFRS7   | 2.0 | Homo sapiens splicing factor, arginine/serine-rich 7, 35kDa (SFRS7), mRNA [NM_001031684]                                                                       |
| RABL3   | 2.0 | Homo sapiens RAB, member of RAS oncogene family-like 3 (RABL3), mRNA [NM_173825]                                                                               |
| PPTC7   | 2.0 | Homo sapiens PTC7 protein phosphatase homolog (S. cerevisiae) (PPTC7), mRNA [NM_139283]                                                                        |
| TMEM2   | 2.0 | Homo sapiens transmembrane protein 2 (TMEM2), transcript variant 1, mRNA [NM_013390]                                                                           |
| AGPAT6  | 2.0 | Homo sapiens 1-acylglycerol-3-phosphate O-acyltransferase 6 (lysophosphatidic acid acyltransferase, zeta) (AGPAT6), mRNA [NM_178819]                           |
| RPS6KA3 | 2.0 | Homo sapiens ribosomal protein S6 kinase, 90kDa, polypeptide 3 (RPS6KA3), mRNA [NM_004586]                                                                     |
| OAS2    | 2.0 | Homo sapiens 2'-5'-oligoadenylate synthetase 2, 69/71kDa (OAS2), transcript variant 3, mRNA [NM_001032731]                                                     |
| SIRT1   | 2.0 | Homo sapiens sirtuin (silent mating type information regulation 2 homolog) 1 (S. cerevisiae) (SIRT1), transcript variant 1, mRNA [NM_012238]                   |
| CC2D2A  | 2.0 | Homo sapiens coiled-coil and C2 domain containing 2A (CC2D2A), transcript variant 1, mRNA [NM_001080522]                                                       |
| AKR1C1  | 2.0 | Homo sapiens aldo-keto reductase family 1, member C1 (dihydrodiol dehydrogenase 1; 20-alpha (3-alpha)-hydroxysteroid dehydrogenase) (AKR1C1), mRNA [NM_001353] |
| FAM3C   | 2.0 | Homo sapiens family with sequence similarity 3, member C (FAM3C), transcript variant 1, mRNA [NM_014888]                                                       |
| CYP26B1 | 2.0 | Homo sapiens cytochrome P450, family 26, subfamily B, polypeptide 1 (CYP26B1), mRNA [NM_019885]                                                                |
| KRT32   | 2.0 | Homo sapiens keratin 32 (KRT32), mRNA [NM_002278]                                                                                                              |
| TMEM168 | 2.0 | Homo sapiens transmembrane protein 168 (TMEM168), mRNA [NM_022484]                                                                                             |
| HNRPDL  | 2.0 | Homo sapiens heterogeneous nuclear ribonucleoprotein D-like (HNRPDL), transcript variant 2, mRNA [NM_031372]                                                   |
| DSCAM   | 2.0 | Homo sapiens Down syndrome cell adhesion molecule (DSCAM), transcript variant 1, mRNA [NM_001389]                                                              |
| MTMR9   | 2.0 | Homo sapiens myotubularin related protein 9 (MTMR9), mRNA [NM_015458]                                                                                          |
| SUCLA2  | 2.0 | Homo sapiens succinate-CoA ligase, ADP-forming, beta subunit (SUCLA2), nuclear gene encoding mitochondrial protein, mRNA [NM_003850]                           |
| ADCK2   | 2.0 | Homo sapiens aarF domain containing kinase 2 (ADCK2), mRNA [NM_052853]                                                                                         |
| SOX3    | 2.0 | Homo sapiens SRY (sex determining region Y)-box 3 (SOX3), mRNA [NM_005634]                                                                                     |
| HRK     | 2.0 | Homo sapiens harakiri, BCL2 interacting protein (contains only BH3 domain) (HRK), mRNA [NM_003806]                                                             |
| AIDA    | 2.0 | Homo sapiens axin interactor, dorsalization associated (AIDA), mRNA [NM_022831]                                                                                |
| ZBTB6   | 2.0 | Homo sapiens zinc finger and BTB domain containing 6 (ZBTB6), mRNA [NM_006626]                                                                                 |
| DEPDC6  | 2.0 | Homo sapiens DEP domain containing 6 (DEPDC6), mRNA [NM_022783]                                                                                                |

|           |      |                                                                                                                      |
|-----------|------|----------------------------------------------------------------------------------------------------------------------|
| CRKL      | 2.0  | Homo sapiens v-crk sarcoma virus CT10 oncogene homolog (avian)-like (CRKL), mRNA [NM_005207]                         |
| PTCD3     | 2.0  | Homo sapiens Pentatricopeptide repeat domain 3 (PTCD3), mRNA [NM_017952]                                             |
| URB1      | 2.0  | Homo sapiens URB1 ribosome biogenesis 1 homolog (S. cerevisiae) (URB1), mRNA [NM_014825]                             |
| SMG1      | 2.0  | Homo sapiens SMG1 homolog, phosphatidylinositol 3-kinase-related kinase (C. elegans) (SMG1), mRNA [NM_015092]        |
| DDX58     | 2.0  | Homo sapiens DEAD (Asp-Glu-Ala-Asp) box polypeptide 58 (DDX58), mRNA [NM_014314]                                     |
| WDR1      | 2.0  | Homo sapiens WD repeat domain 1 (WDR1), transcript variant 1, mRNA [NM_017491]                                       |
| KLHDC5    | 2.0  | Homo sapiens kelch domain containing 5 (KLHDC5), mRNA [NM_020782]                                                    |
| ZNF735    | 2.0  | Homo sapiens zinc finger protein 735 (ZNF735), mRNA [NM_001159524]                                                   |
| FUT9      | 2.0  | Homo sapiens fucosyltransferase 9 (alpha (1,3) fucosyltransferase) (FUT9), mRNA [NM_006581]                          |
| SCD       | 2.0  | Homo sapiens stearoyl-CoA desaturase (delta-9-desaturase) (SCD), mRNA [NM_005063]                                    |
| CREB5     | 2.0  | Homo sapiens cAMP responsive element binding protein 5 (CREB5), transcript variant 1, mRNA [NM_182898]               |
| ZNF589    | 2.0  | Homo sapiens zinc finger protein 589 (ZNF589), mRNA [NM_016089]                                                      |
| ZNF532    | 2.0  | Homo sapiens zinc finger protein 532 (ZNF532), mRNA [NM_018181]                                                      |
| EI24      | 2.0  | Homo sapiens etoposide induced 2.4 mRNA (EI24), transcript variant 1, mRNA [NM_004879]                               |
| DOCK7     | 2.0  | Homo sapiens dedicator of cytokinesis 7 (DOCK7), mRNA [NM_033407]                                                    |
| BRX1      | 2.0  | Homo sapiens BRX1, biogenesis of ribosomes, homolog (S. cerevisiae) (BRX1), mRNA [NM_018321]                         |
| CD244     | 2.0  | Homo sapiens CD244 molecule, natural killer cell receptor 2B4 (CD244), transcript variant 2, mRNA [NM_001166663]     |
| USP3      | 2.0  | Homo sapiens ubiquitin specific peptidase 3 (USP3), mRNA [NM_006537]                                                 |
| CCDC49    | 2.0  | Homo sapiens coiled-coil domain containing 49 (CCDC49), mRNA [NM_017748]                                             |
| MAT1A     | 2.0  | Homo sapiens methionine adenosyltransferase I, alpha (MAT1A), mRNA [NM_000429]                                       |
| YES1      | 2.0  | Homo sapiens v-yes-1 Yamaguchi sarcoma viral oncogene homolog 1 (YES1), mRNA [NM_005433]                             |
| OR1F1     | 2.0  | Homo sapiens olfactory receptor, family 1, subfamily F, member 1 (OR1F1), mRNA [NM_012360]                           |
| WTIP      | -2.0 | Homo sapiens Wilms tumor 1 interacting protein (WTIP), mRNA [NM_001080436]                                           |
| PALM3     | -2.0 | Homo sapiens Paralemmin-3 (PALM3), mRNA [NM_001145028]                                                               |
| CRB3      | -2.0 | Homo sapiens crumbs homolog 3 (Drosophila) (CRB3), transcript variant 2, mRNA [NM_139161]                            |
| B3GNT5    | -2.0 | Homo sapiens UDP-GlcNAc:betaGal beta-1,3-N-acetylglucosaminyltransferase 5 (B3GNT5), mRNA [NM_032047]                |
| RNF43     | -2.0 | Homo sapiens ring finger protein 43 (RNF43), mRNA [NM_017763]                                                        |
| PPP1R3C   | -2.0 | Homo sapiens protein phosphatase 1, regulatory (inhibitor) subunit 3C (PPP1R3C), mRNA [NM_005398]                    |
| KCTD19    | -2.0 | Homo sapiens potassium channel tetramerisation domain containing 19 (KCTD19), mRNA [NM_001100915]                    |
| BLNK      | -2.0 | Homo sapiens B-cell linker (BLNK), transcript variant 1, mRNA [NM_013314]                                            |
| ITPKA     | -2.0 | Homo sapiens inositol 1,4,5-trisphosphate 3-kinase A (ITPKA), mRNA [NM_002220]                                       |
| PRINS     | -2.1 | Homo sapiens psoriasis associated RNA induced by stress (non-protein coding) (PRINS), non-coding RNA [NR_023388]     |
| PRSS22    | -2.1 | Homo sapiens protease, serine, 22 (PRSS22), mRNA [NM_022119]                                                         |
| MSX2P1    | -2.1 | Homo sapiens msh homeobox 2 pseudogene 1 (MSX2P1), non-coding RNA [NR_002307]                                        |
| GLRX      | -2.1 | Homo sapiens glutaredoxin (thioltransferase) (GLRX), transcript variant 1, mRNA [NM_002064]                          |
| HIST1H2BF | -2.1 | Homo sapiens histone cluster 1, H2bf (HIST1H2BF), mRNA [NM_003522]                                                   |
| LIPH      | -2.1 | Homo sapiens lipase, member H (LIPH), mRNA [NM_139248]                                                               |
| EMILIN1   | -2.1 | Homo sapiens elastin microfibril interfacer 1 (EMILIN1), mRNA [NM_007046]                                            |
| LHX2      | -2.1 | Homo sapiens LIM homeobox 2 (LHX2), mRNA [NM_004789]                                                                 |
| SOX2      | -2.1 | Homo sapiens SRY (sex determining region Y)-box 2 (SOX2), mRNA [NM_003106]                                           |
| PNRC1     | -2.1 | Homo sapiens proline-rich nuclear receptor coactivator 1 (PNRC1), mRNA [NM_006813]                                   |
| PLEKHF2   | -2.1 | Homo sapiens pleckstrin homology domain containing, family F (with FYVE domain) member 2 (PLEKHF2), mRNA [NM_024613] |

|          |      |                                                                                                                                       |
|----------|------|---------------------------------------------------------------------------------------------------------------------------------------|
| WNT6     | -2.1 | Homo sapiens wingless-type MMTV integration site family, member 6 (WNT6), mRNA [NM_006522]                                            |
| TM4SF1   | -2.1 | Homo sapiens transmembrane 4 L six family member 1 (TM4SF1), mRNA [NM_014220]                                                         |
| DNAJB5   | -2.1 | Homo sapiens DnaJ (Hsp40) homolog, subfamily B, member 5 (DNAJB5), transcript variant 3, mRNA [NM_012266]                             |
| KLHDC9   | -2.2 | Homo sapiens kelch domain containing 9 (KLHDC9), transcript variant 2, mRNA [NM_001007255]                                            |
| CDKN2D   | -2.2 | Homo sapiens cyclin-dependent kinase inhibitor 2D (p19, inhibits CDK4) (CDKN2D), transcript variant 1, mRNA [NM_001800]               |
| COL9A3   | -2.2 | Homo sapiens collagen, type IX, alpha 3 (COL9A3), mRNA [NM_001853]                                                                    |
| EDN2     | -2.2 | Homo sapiens endothelin 2 (EDN2), mRNA [NM_001956]                                                                                    |
| TET1     | -2.2 | Homo sapiens tet oncogene 1 (TET1), mRNA [NM_030625]                                                                                  |
| TP53INP1 | -2.2 | Homo sapiens tumor protein p53 inducible nuclear protein 1 (TP53INP1), transcript variant 1, mRNA [NM_033285]                         |
| ZNF44    | -2.2 | Homo sapiens zinc finger protein 44, mRNA (cDNA clone IMAGE:3544853). [BC001868]                                                      |
| S1PR3    | -2.2 | Homo sapiens sphingosine-1-phosphate receptor 3 (S1PR3), mRNA [NM_005226]                                                             |
| NACC2    | -2.2 | Homo sapiens NACC family member 2, BEN and BTB (POZ) domain containing (NACC2), mRNA [NM_144653]                                      |
| CHRNB1   | -2.2 | Homo sapiens cholinergic receptor, nicotinic, beta 1 (muscle) (CHRNB1), mRNA [NM_000747]                                              |
| HRASLS2  | -2.3 | Homo sapiens HRAS-like suppressor 2 (HRASLS2), mRNA [NM_017878]                                                                       |
| TSC22D3  | -2.3 | Homo sapiens TSC22 domain family, member 3 (TSC22D3), transcript variant 2, mRNA [NM_004089]                                          |
| ABHD8    | -2.3 | Homo sapiens abhydrolase domain containing 8 (ABHD8), mRNA [NM_024527]                                                                |
| HOPX     | -2.3 | Homo sapiens HOP homeobox (HOPX), transcript variant 2, mRNA [NM_139211]                                                              |
| FAM84A   | -2.3 | Homo sapiens family with sequence similarity 84, member A (FAM84A), mRNA [NM_145175]                                                  |
| ZNF821   | -2.3 | Homo sapiens zinc finger protein 821 (ZNF821), mRNA [NM_017530]                                                                       |
| PLEKHA2  | -2.3 | Homo sapiens pleckstrin homology domain containing, family A (phosphoinositide binding specific) member 2 (PLEKHA2), mRNA [NM_021623] |
| B3GALT4  | -2.4 | Homo sapiens UDP-Gal:betaGlcNAc beta 1,3-galactosyltransferase, polypeptide 4 (B3GALT4), mRNA [NM_003782]                             |
| SLC31A2  | -2.5 | Homo sapiens solute carrier family 31 (copper transporters), member 2 (SLC31A2), mRNA [NM_001860]                                     |
| SALL2    | -2.6 | Homo sapiens sal-like 2 (Drosophila) (SALL2), mRNA [NM_005407]                                                                        |
| GRHL3    | -2.6 | Homo sapiens grainyhead-like 3 (Drosophila) (GRHL3), transcript variant 2, mRNA [NM_198173]                                           |
| HEXIM2   | -2.7 | Homo sapiens hexamethylene bis-acetamide inducible 2 (HEXIM2), mRNA [NM_144608]                                                       |
| BIK      | -2.7 | Homo sapiens BCL2-interacting killer (apoptosis-inducing) (BIK), mRNA [NM_001197]                                                     |
| S100A9   | -2.8 | Homo sapiens S100 calcium binding protein A9 (S100A9), mRNA [NM_002965]                                                               |
| S100A8   | -2.8 | Homo sapiens S100 calcium binding protein A8 (S100A8), mRNA [NM_002964]                                                               |
| SIRT4    | -2.9 | Homo sapiens sirtuin (silent mating type information regulation 2 homolog) 4 (S. cerevisiae) (SIRT4), mRNA [NM_012240]                |
| PSCA     | -3.0 | Homo sapiens prostate stem cell antigen (PSCA), mRNA [NM_005672]                                                                      |
| VPS37D   | -3.0 | Homo sapiens vacuolar protein sorting 37 homolog D (S. cerevisiae) (VPS37D), mRNA [NM_001077621]                                      |
| ARL4D    | -3.3 | Homo sapiens ADP-ribosylation factor-like 4D (ARL4D), mRNA [NM_001661]                                                                |
| ACTG2    | -4.2 | Homo sapiens actin, gamma 2, smooth muscle, enteric (ACTG2), mRNA [NM_001615]                                                         |

<sup>1</sup>Fold change in gene expression of MCF-7/pLKO untreated vs. 100 pM  $\beta$ -estradiol treatment for

6 hrs

**Supplementary Table 2.** MCF-7/pLKO  $\beta$ -estradiol response genes significantly reduced by 2-fold or greater in the absence of HER4/4ICD expression.

| Gene     | Fold $\Delta$ MCF-7 pLKO <sup>1</sup> | Fold $\Delta$ MCF-7 H4Si4 <sup>1</sup> | Fold Reduction <sup>2</sup> | Description and Genbank Accession                                                                                                                                                  |
|----------|---------------------------------------|----------------------------------------|-----------------------------|------------------------------------------------------------------------------------------------------------------------------------------------------------------------------------|
| AEN      | 5.8                                   | 1.0                                    | 5.8                         | Homo sapiens apoptosis enhancing nuclease (AEN), mRNA [NM_022767]                                                                                                                  |
| IL6ST    | 5.2                                   | 1.0                                    | 5.2                         | Homo sapiens interleukin 6 signal transducer (gp130, oncostatin M receptor) (IL6ST), transcript variant 2, mRNA [NM_175767]                                                        |
| TNPO1    | 5.1                                   | 1.0                                    | 5.1                         | Homo sapiens transportin 1 (TNPO1), transcript variant 1, mRNA [NM_002270]                                                                                                         |
| SMARCAD1 | 4.4                                   | 1.0                                    | 4.4                         | Homo sapiens SWI/SNF-related, matrix-associated actin-dependent regulator of chromatin, subfamily a, containing DEAD/H box 1 (SMARCAD1), transcript variant 1, mRNA [NM_001128429] |
| CCDC76   | 4.8                                   | 1.1                                    | 4.4                         | Homo sapiens coiled-coil domain containing 76 (CCDC76), mRNA [NM_019083]                                                                                                           |
| THADA    | 4.0                                   | 1.0                                    | 4.0                         | Homo sapiens thyroid adenoma associated (THADA), transcript variant 3, mRNA [NM_001083953]                                                                                         |
| ZMYM6    | 3.9                                   | 1.0                                    | 3.9                         | Homo sapiens zinc finger, MYM-type 6 (ZMYM6), mRNA [NM_007167]                                                                                                                     |
| ATXN3    | 3.9                                   | 1.0                                    | 3.9                         | Homo sapiens ataxin 3 (ATXN3), transcript variant reference, mRNA [NM_004993]                                                                                                      |
| RAB33A   | 3.9                                   | 1.0                                    | 3.9                         | Homo sapiens RAB33A, member RAS oncogene family (RAB33A), mRNA [NM_004794]                                                                                                         |
| PIGW     | 5.6                                   | 1.5                                    | 3.8                         | Homo sapiens phosphatidylinositol glycan anchor biosynthesis, class W (PIGW), mRNA [NM_178517]                                                                                     |
| USP25    | 3.8                                   | 1.0                                    | 3.8                         | Homo sapiens ubiquitin specific peptidase 25 (USP25), mRNA [NM_013396]                                                                                                             |
| ABHD2    | 3.8                                   | 1.0                                    | 3.8                         | Homo sapiens abhydrolase domain containing 2 (ABHD2), transcript variant 1, mRNA [NM_007011]                                                                                       |
| HSPA4L   | 3.6                                   | 1.0                                    | 3.6                         | Homo sapiens heat shock 70kDa protein 4-like (HSPA4L), mRNA [NM_014278]                                                                                                            |
| TOMM70A  | 3.5                                   | 1.0                                    | 3.5                         | Homo sapiens translocase of outer mitochondrial membrane 70 homolog A (S. cerevisiae) (TOMM70A), nuclear gene encoding mitochondrial protein, mRNA [NM_014820]                     |
| TMEM170B | 3.8                                   | 1.1                                    | 3.5                         | Homo sapiens transmembrane protein 170B (TMEM170B), mRNA [NM_001100829]                                                                                                            |
| NR1D2    | 4.7                                   | 1.3                                    | 3.5                         | Homo sapiens nuclear receptor subfamily 1, group D, member 2 (NR1D2), transcript variant 1, mRNA [NM_005126]                                                                       |
| USP15    | 3.5                                   | 1.0                                    | 3.5                         | Homo sapiens ubiquitin specific peptidase 15 (USP15), mRNA [NM_006313]                                                                                                             |
| MTX3     | 3.5                                   | 1.0                                    | 3.5                         | Homo sapiens metaxin 3 (MTX3), mRNA [NM_001010891]                                                                                                                                 |
| SEC23B   | 3.5                                   | 1.0                                    | 3.5                         | Homo sapiens Sec23 homolog B (S. cerevisiae) (SEC23B), transcript variant 2, mRNA [NM_032985]                                                                                      |
| ATAD5    | 3.5                                   | 1.0                                    | 3.5                         | Homo sapiens ATPase family, AAA domain containing 5 (ATAD5), mRNA [NM_024857]                                                                                                      |
| ZMAT1    | 3.4                                   | 1.0                                    | 3.4                         | Homo sapiens zinc finger, matrin type 1 (ZMAT1), transcript variant 3, mRNA [NM_032441]                                                                                            |
| HBEGF    | 4.1                                   | 1.2                                    | 3.4                         | Homo sapiens heparin-binding EGF-like growth factor (HBEGF), mRNA [NM_001945]                                                                                                      |
| PALB2    | 3.6                                   | 1.0                                    | 3.4                         | Homo sapiens partner and localizer of BRCA2 (PALB2), mRNA [NM_024675]                                                                                                              |
| CCDC138  | 3.4                                   | 1.0                                    | 3.4                         | Homo sapiens coiled-coil domain containing 138 (CCDC138), mRNA [NM_144978]                                                                                                         |
| BDP1     | 3.4                                   | 1.0                                    | 3.4                         | Homo sapiens B double prime 1, subunit of RNA polymerase III transcription initiation factor IIIB (BDP1), mRNA [NM_018429]                                                         |
| RCN1     | 3.4                                   | 1.0                                    | 3.4                         | Homo sapiens reticulocalbin 1, EF-hand calcium binding domain (RCN1), mRNA [NM_002901]                                                                                             |
| FAR1     | 3.4                                   | 1.0                                    | 3.4                         | Homo sapiens fatty acyl CoA reductase 1 (FAR1), mRNA [NM_032228]                                                                                                                   |
| SCNN1A   | 3.4                                   | 1.0                                    | 3.4                         | Homo sapiens sodium channel, nonvoltage-gated 1 alpha (SCNN1A), transcript variant 1, mRNA [NM_001038]                                                                             |
| KIF18A   | 3.4                                   | 1.0                                    | 3.4                         | Homo sapiens kinesin family member 18A (KIF18A), mRNA [NM_031217]                                                                                                                  |
| UAP1     | 3.4                                   | 1.0                                    | 3.4                         | Homo sapiens UDP-N-acetylglucosamine pyrophosphorylase 1 (UAP1), mRNA [NM_003115]                                                                                                  |
| GOLGB1   | 3.3                                   | 1.0                                    | 3.3                         | Homo sapiens golgin B1, golgi integral membrane protein (GOLGB1), mRNA [NM_004487]                                                                                                 |
| PFAS     | 3.3                                   | 1.0                                    | 3.3                         | Homo sapiens phosphoribosylformylglycinamide synthase (PFAS), mRNA [NM_012393]                                                                                                     |
| SLC30A9  | 3.3                                   | 1.0                                    | 3.3                         | Homo sapiens solute carrier family 30 (zinc transporter), member 9 (SLC30A9), mRNA [NM_006345]                                                                                     |
| MINA     | 3.3                                   | 1.0                                    | 3.3                         | Homo sapiens MYC induced nuclear antigen (MINA), transcript variant 3, mRNA [NM_032778]                                                                                            |
| CDC73    | 3.3                                   | 1.0                                    | 3.3                         | Homo sapiens cell division cycle 73, Paf1/RNA polymerase II complex component, homolog (S.                                                                                         |

|          |     |     |     |                                                                                                                                              |
|----------|-----|-----|-----|----------------------------------------------------------------------------------------------------------------------------------------------|
|          |     |     |     | cerevisiae) (CDC73), mRNA [NM_024529]                                                                                                        |
| ZNF761   | 3.3 | 1.0 | 3.3 | Homo sapiens zinc finger protein 761 (ZNF761), mRNA [NM_001008401]                                                                           |
| NIN      | 3.2 | 1.0 | 3.2 | Homo sapiens ninein (GSK3B interacting protein) (NIN), transcript variant 2, mRNA [NM_020921]                                                |
| BLZF1    | 3.2 | 1.0 | 3.2 | Homo sapiens basic leucine zipper nuclear factor 1 (BLZF1), mRNA [NM_003666]                                                                 |
| LRPPRC   | 4.1 | 1.3 | 3.2 | Homo sapiens leucine-rich PPR-motif containing (LRPPRC), mRNA [NM_133259]                                                                    |
| RNF20    | 3.2 | 1.0 | 3.2 | Homo sapiens ring finger protein 20 (RNF20), mRNA [NM_019592]                                                                                |
| RAI14    | 3.2 | 1.0 | 3.2 | Homo sapiens retinoic acid induced 14 (RAI14), transcript variant 1, mRNA [NM_015577]                                                        |
| SLC7A11  | 3.1 | 1.0 | 3.1 | Homo sapiens solute carrier family 7, (cationic amino acid transporter, y+ system) member 11 (SLC7A11), mRNA [NM_014331]                     |
| CWF19L2  | 3.1 | 1.0 | 3.1 | Homo sapiens CWF19-like 2, cell cycle control (S. pombe) (CWF19L2), mRNA [NM_152434]                                                         |
| IRS1     | 5.2 | 1.7 | 3.1 | Homo sapiens insulin receptor substrate 1 (IRS1), mRNA [NM_005544]                                                                           |
| R3HDM1   | 3.1 | 1.0 | 3.1 | Homo sapiens R3H domain containing 1 (R3HDM1), mRNA [NM_015361]                                                                              |
| TNFRSF6B | 3.1 | 1.0 | 3.1 | Homo sapiens tumor necrosis factor receptor superfamily, member 6b, decoy (TNFRSF6B), transcript variant M68C, mRNA [NM_032945]              |
| ZNF326   | 3.1 | 1.0 | 3.1 | Homo sapiens zinc finger protein 326 (ZNF326), transcript variant 3, mRNA [NM_182975]                                                        |
| GARNL3   | 3.6 | 1.2 | 3.1 | Homo sapiens GTPase activating Rap/RanGAP domain-like 3 (GARNL3), mRNA [NM_032293]                                                           |
| ARAP2    | 3.0 | 1.0 | 3.0 | Homo sapiens ArfGAP with RhoGAP domain, ankyrin repeat and PH domain 2 (ARAP2), mRNA [NM_015230]                                             |
| DSG2     | 3.0 | 1.0 | 3.0 | Homo sapiens desmoglein 2 (DSG2), mRNA [NM_001943]                                                                                           |
| WDR36    | 4.9 | 1.6 | 3.0 | Homo sapiens WD repeat domain 36 (WDR36), mRNA [NM_139281]                                                                                   |
| VPRBP    | 3.4 | 1.1 | 3.0 | Homo sapiens Vpr (HIV-1) binding protein (VPRBP), mRNA [NM_014703]                                                                           |
| IMPAD1   | 3.0 | 1.0 | 3.0 | Homo sapiens inositol monophosphatase domain containing 1 (IMPAD1), mRNA [NM_017813]                                                         |
| HMGCS1   | 3.0 | 1.0 | 3.0 | Homo sapiens 3-hydroxy-3-methylglutaryl-Coenzyme A synthase 1 (soluble) (HMGCS1), transcript variant 2, mRNA [NM_002130]                     |
| ZNF330   | 3.0 | 1.0 | 3.0 | Homo sapiens zinc finger protein 330 (ZNF330), mRNA [NM_014487]                                                                              |
| DGKE     | 3.3 | 1.1 | 3.0 | Homo sapiens diacylglycerol kinase, epsilon 64kDa (DGKE), mRNA [NM_003647]                                                                   |
| TUBGCP5  | 3.0 | 1.0 | 3.0 | Homo sapiens tubulin, gamma complex associated protein 5 (TUBGCP5), transcript variant 1, mRNA [NM_052903]                                   |
| FHL2     | 3.0 | 1.0 | 3.0 | Homo sapiens four and a half LIM domains 2 (FHL2), transcript variant 2, mRNA [NM_201555]                                                    |
| NFATC3   | 2.9 | 1.0 | 2.9 | Homo sapiens nuclear factor of activated T-cells, cytoplasmic, calcineurin-dependent 3 (NFATC3), transcript variant 4, mRNA [NM_173164]      |
| AHI1     | 2.9 | 1.0 | 2.9 | Homo sapiens Abelson helper integration site 1 (AHI1), transcript variant 2, mRNA [NM_017651]                                                |
| CYP27B1  | 3.8 | 1.3 | 2.9 | Homo sapiens cytochrome P450, family 27, subfamily B, polypeptide 1 (CYP27B1), nuclear gene encoding mitochondrial protein, mRNA [NM_000785] |
| USP34    | 2.9 | 1.0 | 2.9 | Homo sapiens ubiquitin specific peptidase 34 (USP34), mRNA [NM_014709]                                                                       |
| PNN      | 2.9 | 1.0 | 2.9 | Homo sapiens pinin, desmosome associated protein (PNN), mRNA [NM_002687]                                                                     |
| SLC38A2  | 2.9 | 1.0 | 2.9 | Homo sapiens solute carrier family 38, member 2 (SLC38A2), mRNA [NM_018976]                                                                  |
| SACS     | 2.9 | 1.0 | 2.9 | Homo sapiens spastic ataxia of Charlevoix-Saguenay (sacsin) (SACS), mRNA [NM_014363]                                                         |
| RAB37    | 4.4 | 1.5 | 2.9 | Homo sapiens RAB37, member RAS oncogene family (RAB37), transcript variant 3, mRNA [NM_175738]                                               |
| CLASP2   | 2.9 | 1.0 | 2.9 | Homo sapiens cytoplasmic linker associated protein 2 (CLASP2), mRNA [NM_015097]                                                              |
| SVIL     | 5.4 | 1.9 | 2.9 | Homo sapiens supervillin (SVIL), transcript variant 2, mRNA [NM_021738]                                                                      |
| TBC1D4   | 2.9 | 1.0 | 2.9 | Homo sapiens TBC1 domain family, member 4 (TBC1D4), mRNA [NM_014832]                                                                         |
| UBE2N    | 2.8 | 1.0 | 2.8 | Homo sapiens ubiquitin-conjugating enzyme E2N (UBC13 homolog, yeast) (UBE2N), mRNA [NM_003348]                                               |
| XPOT     | 2.8 | 1.0 | 2.8 | Homo sapiens exportin, tRNA (nuclear export receptor for tRNAs) (XPOT), mRNA [NM_007235]                                                     |
| AQR      | 2.8 | 1.0 | 2.8 | Homo sapiens aquarius homolog (mouse) (AQR), mRNA [NM_014691]                                                                                |
| SLC26A1  | 2.8 | 1.0 | 2.8 | Homo sapiens solute carrier family 26 (sulfate transporter), member 1 (SLC26A1), transcript variant 2, mRNA [NM_134425]                      |
| RAP1GAP2 | 3.9 | 1.4 | 2.8 | Homo sapiens RAP1 GTPase activating protein 2 (RAP1GAP2), transcript variant 1, mRNA [NM_015085]                                             |

|           |      |     |     |                                                                                                                                                      |
|-----------|------|-----|-----|------------------------------------------------------------------------------------------------------------------------------------------------------|
| PMPCB     | 2.8  | 1.0 | 2.8 | Homo sapiens peptidase (mitochondrial processing) beta (PMPCB), nuclear gene encoding mitochondrial protein, mRNA [NM_004279]                        |
| RNMT      | 3.0  | 1.1 | 2.8 | Homo sapiens RNA (guanine-7-) methyltransferase (RNMT), mRNA [NM_003799]                                                                             |
| PRDM12    | 5.3  | 1.9 | 2.8 | Homo sapiens PR domain containing 12 (PRDM12), mRNA [NM_021619]                                                                                      |
| IGFBP4    | 4.0  | 1.5 | 2.7 | Homo sapiens insulin-like growth factor binding protein 4 (IGFBP4), mRNA [NM_001552]                                                                 |
| JMJD1C    | 2.7  | 1.0 | 2.7 | Homo sapiens jumonji domain containing 1C (JMJD1C), transcript variant 1, mRNA [NM_032776]                                                           |
| ABI2      | 2.7  | 1.0 | 2.7 | Homo sapiens abl-interactor 2 (ABI2), mRNA [NM_005759]                                                                                               |
| IFIT3     | 3.7  | 1.4 | 2.7 | Homo sapiens interferon-induced protein with tetratricopeptide repeats 3 (IFIT3), transcript variant 1, mRNA [NM_001549]                             |
| NEAT1     | 2.7  | 1.0 | 2.7 | Human MEN1 region clone epsilon [AF001893]                                                                                                           |
| IL6ST     | 2.7  | 1.0 | 2.7 | Homo sapiens interleukin 6 signal transducer (gp130, oncostatin M receptor) (IL6ST), transcript variant 1, mRNA [NM_002184]                          |
| USP12     | 3.2  | 1.2 | 2.7 | Homo sapiens ubiquitin specific peptidase 12 (USP12), mRNA [NM_182488]                                                                               |
| RUVBL1    | 2.7  | 1.0 | 2.7 | Homo sapiens RuvB-like 1 (E. coli) (RUVBL1), mRNA [NM_003707]                                                                                        |
| SERPINA3  | 2.7  | 1.0 | 2.7 | Homo sapiens serpin peptidase inhibitor, clade A (alpha-1 antiproteinase, antitrypsin), member 3 (SERPINA3), mRNA [NM_001085]                        |
| JAK1      | 2.6  | 1.0 | 2.6 | Homo sapiens Janus kinase 1 (JAK1), mRNA [NM_002227]                                                                                                 |
| ADAL      | 2.6  | 1.0 | 2.6 | Homo sapiens adenosine deaminase-like (ADAL), transcript variant 2, mRNA [NM_001012969]                                                              |
| NT5DC3    | 3.7  | 1.4 | 2.6 | Homo sapiens 5'-nucleotidase domain containing 3 (NT5DC3), mRNA [NM_001031701]                                                                       |
| XPO6      | 2.6  | 1.0 | 2.6 | Homo sapiens exportin 6 (XPO6), mRNA [NM_015171]                                                                                                     |
| AKAP1     | 3.7  | 1.4 | 2.6 | Homo sapiens A kinase (PRKA) anchor protein 1 (AKAP1), nuclear gene encoding mitochondrial protein, mRNA [NM_003488]                                 |
| FAM119B   | 2.6  | 1.0 | 2.6 | Homo sapiens family with sequence similarity 119, member B (FAM119B), transcript variant 2, mRNA [NM_206914]                                         |
| ANKH      | 4.1  | 1.6 | 2.6 | Homo sapiens ankylosis, progressive homolog (mouse) (ANKH), mRNA [NM_054027]                                                                         |
| ALMS1     | 2.6  | 1.0 | 2.6 | Homo sapiens Alstrom syndrome 1 (ALMS1), mRNA [NM_015120]                                                                                            |
| AP4B1     | 2.6  | 1.0 | 2.6 | Homo sapiens adaptor-related protein complex 4, beta 1 subunit (AP4B1), mRNA [NM_006594]                                                             |
| ECE1      | 2.6  | 1.0 | 2.6 | Homo sapiens endothelin converting enzyme 1 (ECE1), transcript variant 3, mRNA [NM_001113347]                                                        |
| SECISBP2  | 2.6  | 1.0 | 2.6 | Homo sapiens SECIS binding protein 2 (SECISBP2), mRNA [NM_024077]                                                                                    |
| CAB39L    | 2.6  | 1.0 | 2.6 | Homo sapiens calcium binding protein 39-like (CAB39L), transcript variant 2, mRNA [NM_001079670]                                                     |
| CRTC3     | 2.6  | 1.0 | 2.6 | Homo sapiens CREB regulated transcription coactivator 3 (CRTC3), transcript variant 1, mRNA [NM_022769]                                              |
| SLC27A2   | 2.6  | 1.0 | 2.6 | Homo sapiens solute carrier family 27 (fatty acid transporter), member 2 (SLC27A2), transcript variant 1, mRNA [NM_003645]                           |
| DNAH11    | 2.6  | 1.0 | 2.6 | Homo sapiens dynein, axonemal, heavy chain 11 (DNAH11), mRNA [NM_003777]                                                                             |
| LDHA      | 2.6  | 1.0 | 2.6 | Homo sapiens lactate dehydrogenase A (LDHA), transcript variant 1, mRNA [NM_005566]                                                                  |
| FOS       | 9.6  | 3.7 | 2.6 | Homo sapiens FBJ murine osteosarcoma viral oncogene homolog (FOS), mRNA [NM_005252]                                                                  |
| ZNF700    | 3.7  | 1.4 | 2.6 | Homo sapiens zinc finger protein 700 (ZNF700), mRNA [NM_144566]                                                                                      |
| RAB11FIP2 | 2.6  | 1.0 | 2.6 | Homo sapiens RAB11 family interacting protein 2 (class I) (RAB11FIP2), mRNA [NM_014904]                                                              |
| NRAP      | 4.9  | 1.9 | 2.6 | Homo sapiens nebulin-related anchoring protein (NRAP), transcript variant 2, mRNA [NM_198060]                                                        |
| CXCL12    | 21.8 | 8.5 | 2.6 | Homo sapiens chemokine (C-X-C motif) ligand 12 (stromal cell-derived factor 1) (CXCL12), transcript variant 1, mRNA [NM_199168]                      |
| FRMD3     | 6.5  | 2.6 | 2.5 | FERM domain-containing protein 3 (Band 4.1-like protein 4O)(Ovary type protein 4.1)(4.1O) [Source:UniProtKB/Swiss-Prot;Acc:A2A2Y4] [ENST00000304195] |
| PFKFB3    | 2.5  | 1.0 | 2.5 | Homo sapiens 6-phosphofructo-2-kinase/fructose-2,6-biphosphatase 3 (PFKFB3), transcript variant 1, mRNA [NM_004566]                                  |
| ZNF26     | 2.5  | 1.0 | 2.5 | Homo sapiens zinc finger protein 26 (ZNF26), mRNA [NM_019591]                                                                                        |
| ZNF434    | 2.5  | 1.0 | 2.5 | Homo sapiens zinc finger protein 434 (ZNF434), mRNA [NM_017810]                                                                                      |
| ANKRD13B  | 3.6  | 1.4 | 2.5 | Homo sapiens ankyrin repeat domain 13B (ANKRD13B), mRNA [NM_152345]                                                                                  |
| PHF14     | 4.2  | 1.7 | 2.5 | Homo sapiens PHD finger protein 14 (PHF14), transcript variant 2, mRNA [NM_014660]                                                                   |
| CDNF      | 2.5  | 1.0 | 2.5 | Homo sapiens cerebral dopamine neurotrophic factor (CDNF), mRNA [NM_001029954]                                                                       |

|         |     |     |     |                                                                                                                                                             |
|---------|-----|-----|-----|-------------------------------------------------------------------------------------------------------------------------------------------------------------|
| INO80   | 2.5 | 1.0 | 2.5 | Homo sapiens INO80 homolog ( <i>S. cerevisiae</i> ) (INO80), mRNA [NM_017553]                                                                               |
| PION    | 2.5 | 1.0 | 2.5 | Homo sapiens pigeon homolog ( <i>Drosophila</i> ) (PION), mRNA [NM_017439]                                                                                  |
| LONRF1  | 3.9 | 1.6 | 2.5 | Homo sapiens LON peptidase N-terminal domain and ring finger 1 (LONRF1), mRNA [NM_152271]                                                                   |
| FCRLB   | 2.5 | 1.0 | 2.5 | Homo sapiens Fc receptor-like B (FCRLB), mRNA [NM_001002901]                                                                                                |
| SLC22A4 | 2.5 | 1.0 | 2.5 | Homo sapiens solute carrier family 22 (organic cation/ergothioneine transporter), member 4 (SLC22A4), mRNA [NM_003059]                                      |
| IMMT    | 2.5 | 1.0 | 2.5 | Homo sapiens inner membrane protein, mitochondrial (mitofilin) (IMMT), nuclear gene encoding mitochondrial protein, transcript variant 1, mRNA [NM_006839]  |
| AKAP10  | 2.5 | 1.0 | 2.5 | Homo sapiens A kinase (PRKA) anchor protein 10 (AKAP10), nuclear gene encoding mitochondrial protein, mRNA [NM_007202]                                      |
| MLH3    | 2.6 | 1.1 | 2.5 | Homo sapiens mutL homolog 3 ( <i>E. coli</i> ) (MLH3), transcript variant 1, mRNA [NM_001040108]                                                            |
| ITPR1   | 3.5 | 1.4 | 2.5 | Homo sapiens inositol 1,4,5-triphosphate receptor, type 1 (ITPR1), transcript variant 2, mRNA [NM_002222]                                                   |
| METTL9  | 2.5 | 1.0 | 2.5 | Homo sapiens methyltransferase like 9 (METTL9), transcript variant 1, mRNA [NM_016025]                                                                      |
| IL6ST   | 2.5 | 1.0 | 2.5 | Homo sapiens interleukin 6 signal transducer (gp130, oncostatin M receptor) (IL6ST), transcript variant 2, mRNA [NM_175767]                                 |
| ESCO1   | 2.5 | 1.0 | 2.5 | Homo sapiens establishment of cohesion 1 homolog 1 ( <i>S. cerevisiae</i> ) (ESCO1), mRNA [NM_052911]                                                       |
| DCUN1D4 | 2.5 | 1.0 | 2.5 | Homo sapiens DCN1, defective in cullin neddylation 1, domain containing 4 ( <i>S. cerevisiae</i> ) (DCUN1D4), transcript variant 1, mRNA [NM_001040402]     |
| ARHGAP5 | 2.5 | 1.0 | 2.5 | Homo sapiens Rho GTPase activating protein 5 (ARHGAP5), transcript variant 1, mRNA [NM_001030055]                                                           |
| ZSCAN1  | 3.1 | 1.3 | 2.5 | Homo sapiens zinc finger and SCAN domain containing 1 (ZSCAN1), mRNA [NM_182572]                                                                            |
| SLC3A2  | 4.0 | 1.6 | 2.5 | Homo sapiens solute carrier family 3 (activators of dibasic and neutral amino acid transport), member 2 (SLC3A2), transcript variant 1, mRNA [NM_001012661] |
| LARP1B  | 2.5 | 1.0 | 2.5 | Homo sapiens La ribonucleoprotein domain family, member 1B (LARP1B), transcript variant 1, mRNA [NM_018078]                                                 |
| SGK3    | 8.7 | 3.6 | 2.4 | Homo sapiens serum/glucocorticoid regulated kinase family, member 3 (SGK3), transcript variant 1, mRNA [NM_013257]                                          |
| ANXA1   | 2.4 | 1.0 | 2.4 | Homo sapiens annexin A1 (ANXA1), mRNA [NM_000700]                                                                                                           |
| SLC38A2 | 2.4 | 1.0 | 2.4 | Homo sapiens solute carrier family 38, member 2 (SLC38A2), mRNA [NM_018976]                                                                                 |
| UGCG    | 2.4 | 1.0 | 2.4 | Homo sapiens UDP-glucose ceramide glucosyltransferase (UGCG), mRNA [NM_003358]                                                                              |
| UTP14A  | 2.4 | 1.0 | 2.4 | Homo sapiens UTP14, U3 small nucleolar ribonucleoprotein, homolog A (yeast) (UTP14A), transcript variant 1, mRNA [NM_006649]                                |
| RDX     | 2.4 | 1.0 | 2.4 | Homo sapiens radixin (RDX), mRNA [NM_002906]                                                                                                                |
| GALNT2  | 2.4 | 1.0 | 2.4 | Homo sapiens UDP-N-acetyl-alpha-D-galactosamine:polypeptide N-acetylgalactosaminyltransferase 2 (GalNAc-T2) (GALNT2), mRNA [NM_004481]                      |
| RRN3    | 2.4 | 1.0 | 2.4 | Homo sapiens RRN3 RNA polymerase I transcription factor homolog ( <i>S. cerevisiae</i> ) (RRN3), mRNA [NM_018427]                                           |
| ANXA13  | 2.4 | 1.0 | 2.4 | Homo sapiens annexin A13 (ANXA13), transcript variant 2, mRNA [NM_001003954]                                                                                |
| NUDCD1  | 5.2 | 2.2 | 2.4 | Homo sapiens NudC domain containing 1 (NUDCD1), transcript variant 1, mRNA [NM_032869]                                                                      |
| FTSJD1  | 2.4 | 1.0 | 2.4 | Homo sapiens FtsJ methyltransferase domain containing 1 (FTSJD1), transcript variant 1, mRNA [NM_018348]                                                    |
| GOLM1   | 2.4 | 1.0 | 2.4 | Homo sapiens golgi membrane protein 1 (GOLM1), transcript variant 1, mRNA [NM_016548]                                                                       |
| ZNF544  | 2.4 | 1.0 | 2.4 | Homo sapiens zinc finger protein 544 (ZNF544), mRNA [NM_014480]                                                                                             |
| UACA    | 2.4 | 1.0 | 2.4 | Homo sapiens uveal autoantigen with coiled-coil domains and ankyrin repeats (UACA), transcript variant 2, mRNA [NM_001008224]                               |
| NRIP1   | 3.7 | 1.5 | 2.4 | Homo sapiens nuclear receptor interacting protein 1 (NRIP1), mRNA [NM_003489]                                                                               |
| HTRA3   | 3.4 | 1.4 | 2.4 | Homo sapiens HtrA serine peptidase 3 (HTRA3), mRNA [NM_053044]                                                                                              |
| HECTD3  | 2.4 | 1.0 | 2.4 | Homo sapiens HECT domain containing 3 (HECTD3), mRNA [NM_024602]                                                                                            |
| GIN1    | 2.4 | 1.0 | 2.4 | Homo sapiens gypsy retrotransposon integrase 1 (GIN1), mRNA [NM_017676]                                                                                     |
| RAB39B  | 2.4 | 1.0 | 2.4 | Homo sapiens RAB39B, member RAS oncogene family (RAB39B), mRNA [NM_171998]                                                                                  |
| WDR51B  | 2.4 | 1.0 | 2.4 | Homo sapiens WD repeat domain 51B (WDR51B), mRNA [NM_172240]                                                                                                |
| GPR77   | 3.9 | 1.6 | 2.4 | Homo sapiens G protein-coupled receptor 77 (GPR77), mRNA [NM_018485]                                                                                        |
| IPO5    | 2.4 | 1.0 | 2.4 | Homo sapiens importin 5 (IPO5), mRNA [NM_002271]                                                                                                            |

|          |     |     |     |                                                                                                                                           |
|----------|-----|-----|-----|-------------------------------------------------------------------------------------------------------------------------------------------|
| TAF1A    | 2.8 | 1.2 | 2.4 | Homo sapiens TATA box binding protein (TBP)-associated factor, RNA polymerase I, A, 48kDa (TAF1A), transcript variant 1, mRNA [NM_005681] |
| E2F4     | 2.4 | 1.0 | 2.4 | Homo sapiens E2F transcription factor 4, p107/p130-binding (E2F4), mRNA [NM_001950]                                                       |
| GOLT1B   | 2.4 | 1.0 | 2.4 | Homo sapiens golgi transport 1 homolog B ( <i>S. cerevisiae</i> ) (GOLT1B), mRNA [NM_016072]                                              |
| ZNF513   | 2.4 | 1.0 | 2.4 | Homo sapiens zinc finger protein 513 (ZNF513), mRNA [NM_144631]                                                                           |
| EXOC6    | 2.4 | 1.0 | 2.4 | Homo sapiens exocyst complex component 6 (EXOC6), transcript variant 1, mRNA [NM_019053]                                                  |
| PGLYRP2  | 4.0 | 1.7 | 2.3 | Homo sapiens peptidoglycan recognition protein 2 (PGLYRP2), mRNA [NM_052890]                                                              |
| ATXN1    | 2.6 | 1.1 | 2.3 | Homo sapiens ataxin 1 (ATXN1), transcript variant 1, mRNA [NM_000332]                                                                     |
| SLC16A1  | 3.2 | 1.4 | 2.3 | Homo sapiens solute carrier family 16, member 1 (monocarboxylic acid transporter 1) (SLC16A1), transcript variant 2, mRNA [NM_001166496]  |
| PHLDA1   | 2.3 | 1.0 | 2.3 | Homo sapiens pleckstrin homology-like domain, family A, member 1 (PHLDA1), mRNA [NM_007350]                                               |
| ZP3      | 2.3 | 1.0 | 2.3 | Homo sapiens zona pellucida glycoprotein 3 (sperm receptor) (ZP3), transcript variant 2, mRNA [NM_007155]                                 |
| ATM      | 2.3 | 1.0 | 2.3 | Homo sapiens ataxia telangiectasia mutated (ATM), transcript variant 1, mRNA [NM_000051]                                                  |
| MANEA    | 2.3 | 1.0 | 2.3 | Homo sapiens mannosidase, endo-alpha (MANEA), mRNA [NM_024641]                                                                            |
| WDFY4    | 3.6 | 1.6 | 2.3 | Homo sapiens WDFY family member 4 (WDFY4), mRNA [NM_020945]                                                                               |
| BCL2L15  | 4.1 | 1.8 | 2.3 | Homo sapiens BCL2-like 15 (BCL2L15), mRNA [NM_001010922]                                                                                  |
| RPS6KC1  | 2.3 | 1.0 | 2.3 | Homo sapiens ribosomal protein S6 kinase, 52kDa, polypeptide 1 (RPS6KC1), transcript variant 1, mRNA [NM_012424]                          |
| HNMT     | 2.3 | 1.0 | 2.3 | Homo sapiens histamine N-methyltransferase (HNMT), transcript variant 1, mRNA [NM_006895]                                                 |
| RRP15    | 4.4 | 1.9 | 2.3 | Homo sapiens ribosomal RNA processing 15 homolog ( <i>S. cerevisiae</i> ) (RRP15), mRNA [NM_016052]                                       |
| IL6ST    | 2.3 | 1.0 | 2.3 | Homo sapiens interleukin 6 signal transducer (gp130, oncostatin M receptor) (IL6ST), transcript variant 2, mRNA [NM_175767]               |
| MUC5AC   | 2.3 | 1.0 | 2.3 | PREDICTED: Homo sapiens similar to mucin 5 (LOC100132635), partial mRNA [XM_001717880]                                                    |
| NEDD9    | 4.0 | 1.7 | 2.3 | Homo sapiens neural precursor cell expressed, developmentally down-regulated 9 (NEDD9), transcript variant 1, mRNA [NM_006403]            |
| SPATA13  | 2.3 | 1.0 | 2.3 | Homo sapiens spermatogenesis associated 13 (SPATA13), transcript variant 1, mRNA [NM_001166271]                                           |
| FAM156B  | 2.3 | 1.0 | 2.3 | Homo sapiens family with sequence similarity 156, member B (FAM156B), mRNA [NM_001099684]                                                 |
| DDX21    | 4.8 | 2.1 | 2.3 | Homo sapiens DEAD (Asp-Glu-Ala-Asp) box polypeptide 21 (DDX21), mRNA [NM_004728]                                                          |
| RNPS1    | 2.3 | 1.0 | 2.3 | Homo sapiens RNA binding protein S1, serine-rich domain (RNPS1), transcript variant 1, mRNA [NM_006711]                                   |
| ERRFI1   | 2.3 | 1.0 | 2.3 | Homo sapiens ERBB receptor feedback inhibitor 1 (ERRFI1), mRNA [NM_018948]                                                                |
| ZBTB33   | 2.3 | 1.0 | 2.3 | Homo sapiens zinc finger and BTB domain containing 33 (ZBTB33), mRNA [NM_006777]                                                          |
| AGFG1    | 2.3 | 1.0 | 2.3 | Homo sapiens ArfGAP with FG repeats 1 (AGFG1), transcript variant 1, mRNA [NM_001135187]                                                  |
| PGAM2    | 2.3 | 1.0 | 2.3 | Homo sapiens phosphoglycerate mutase 2 (muscle) (PGAM2), mRNA [NM_000290]                                                                 |
| GPRC5A   | 2.3 | 1.0 | 2.3 | Homo sapiens G protein-coupled receptor, family C, group 5, member A (GPRC5A), mRNA [NM_003979]                                           |
| ERI2     | 2.3 | 1.0 | 2.3 | Homo sapiens ERI1 exoribonuclease family member 2 (ERI2), transcript variant 1, mRNA [NM_001142725]                                       |
| DPH3     | 2.3 | 1.0 | 2.3 | Homo sapiens DPH3, KTI11 homolog ( <i>S. cerevisiae</i> ) (DPH3), transcript variant 1, mRNA [NM_206831]                                  |
| ZNF222   | 2.3 | 1.0 | 2.3 | Homo sapiens zinc finger protein 222 (ZNF222), transcript variant 2, mRNA [NM_013360]                                                     |
| CASP8AP2 | 2.3 | 1.0 | 2.3 | Homo sapiens caspase 8 associated protein 2 (CASP8AP2), transcript variant 1, mRNA [NM_012115]                                            |
| CAMSAP1  | 4.2 | 1.9 | 2.2 | Homo sapiens calmodulin regulated spectrin-associated protein 1 (CAMSAP1), mRNA [NM_015447]                                               |
| ACVR2A   | 2.6 | 1.2 | 2.2 | Homo sapiens activin A receptor, type IIA (ACVR2A), mRNA [NM_001616]                                                                      |
| RASAL2   | 2.2 | 1.0 | 2.2 | Homo sapiens RAS protein activator like 2 (RASAL2), transcript variant 2, mRNA [NM_170692]                                                |
| SON      | 2.2 | 1.0 | 2.2 | Homo sapiens SON DNA binding protein (SON), transcript variant b, mRNA [NM_032195]                                                        |
| NBN      | 2.2 | 1.0 | 2.2 | Homo sapiens nibrin (NBN), mRNA [NM_002485]                                                                                               |
| POLR3F   | 2.2 | 1.0 | 2.2 | Homo sapiens polymerase (RNA) III (DNA directed) polypeptide F, 39 kDa (POLR3F), mRNA [NM_006466]                                         |
| IMPACT   | 2.2 | 1.0 | 2.2 | Homo sapiens Impact homolog (mouse) (IMPACT), mRNA [NM_018439]                                                                            |



|         |      |     |     |                                                                                                                                                                                                                              |
|---------|------|-----|-----|------------------------------------------------------------------------------------------------------------------------------------------------------------------------------------------------------------------------------|
| NHEJ1   | 2.2  | 1.0 | 2.2 | Homo sapiens nonhomologous end-joining factor 1 (NHEJ1), mRNA [NM_024782]                                                                                                                                                    |
| GLUL    | 2.2  | 1.0 | 2.2 | Homo sapiens glutamate-ammonia ligase (glutamine synthetase) (GLUL), transcript variant 1, mRNA [NM_002065]                                                                                                                  |
| UNC13B  | 2.2  | 1.0 | 2.2 | Homo sapiens unc-13 homolog B (C. elegans) (UNC13B), mRNA [NM_006377]                                                                                                                                                        |
| MYBL1   | 6.6  | 3.0 | 2.2 | Homo sapiens v-myb myeloblastosis viral oncogene homolog (avian)-like 1 (MYBL1), transcript variant 1, mRNA [NM_001080416]                                                                                                   |
| POLR1D  | 2.2  | 1.0 | 2.2 | Homo sapiens polymerase (RNA) I polypeptide D, 16kDa (POLR1D), transcript variant 2, mRNA [NM_152705]                                                                                                                        |
| PARP6   | 2.2  | 1.0 | 2.2 | Homo sapiens poly (ADP-ribose) polymerase family, member 6 (PARP6), mRNA [NM_020214]                                                                                                                                         |
| METAP2  | 3.0  | 1.3 | 2.2 | Homo sapiens methionyl aminopeptidase 2 (METAP2), mRNA [NM_006838]                                                                                                                                                           |
| GPX8    | 2.2  | 1.0 | 2.2 | Homo sapiens glutathione peroxidase 8 (putative) (GPX8), mRNA [NM_001008397]                                                                                                                                                 |
| ZNF813  | 2.2  | 1.0 | 2.2 | Homo sapiens zinc finger protein 813 (ZNF813), mRNA [NM_001004301]                                                                                                                                                           |
| ZNF799  | 2.2  | 1.0 | 2.2 | Homo sapiens zinc finger protein 799 (ZNF799), mRNA [NM_001080821]                                                                                                                                                           |
| CCDC112 | 2.2  | 1.0 | 2.2 | Homo sapiens coiled-coil domain containing 112 (CCDC112), transcript variant 2, mRNA [NM_152549]                                                                                                                             |
| SUSD4   | 2.2  | 1.0 | 2.2 | Homo sapiens sushi domain containing 4 (SUSD4), transcript variant 2, mRNA [NM_001037175]                                                                                                                                    |
| RNF14   | 2.2  | 1.0 | 2.2 | Homo sapiens ring finger protein 14 (RNF14), transcript variant 1, mRNA [NM_004290]                                                                                                                                          |
| BTAF1   | 2.2  | 1.0 | 2.2 | Homo sapiens BTAF1 RNA polymerase II, B-TFIID transcription factor-associated, 170kDa (Mot1 homolog, S. cerevisiae) (BTAF1), mRNA [NM_003972]                                                                                |
| ARPP19  | 2.2  | 1.0 | 2.2 | Homo sapiens cAMP-regulated phosphoprotein, 19kDa (ARPP19), mRNA [NM_006628]                                                                                                                                                 |
| NARG1   | 3.1  | 1.4 | 2.2 | Homo sapiens NMDA receptor regulated 1 (NARG1), mRNA [NM_057175]                                                                                                                                                             |
| SPIN1   | 2.2  | 1.0 | 2.2 | Homo sapiens spindlin 1 (SPIN1), mRNA [NM_006717]                                                                                                                                                                            |
| EEF1A1  | 2.2  | 1.0 | 2.2 | Homo sapiens eukaryotic translation elongation factor 1 alpha 1 (EEF1A1), mRNA [NM_001402]                                                                                                                                   |
| GRPEL2  | 2.2  | 1.0 | 2.2 | Homo sapiens GrpE-like 2, mitochondrial (E. coli) (GRPEL2), nuclear gene encoding mitochondrial protein, mRNA [NM_152407]                                                                                                    |
| GDF15   | 2.7  | 1.2 | 2.2 | Homo sapiens growth differentiation factor 15 (GDF15), mRNA [NM_004864]                                                                                                                                                      |
| AHI1    | 2.6  | 1.2 | 2.2 | Homo sapiens Abelson helper integration site 1 (AHI1), transcript variant 2, mRNA [NM_017651]                                                                                                                                |
| TCP1    | 2.2  | 1.0 | 2.2 | Homo sapiens t-complex 1 (TCP1), transcript variant 1, mRNA [NM_030752]                                                                                                                                                      |
| USP41   | 2.2  | 1.0 | 2.2 | Putative ubiquitin carboxyl-terminal hydrolase 41 (EC 3.1.2.15)(Ubiquitin thioesterase 41)(Ubiquitin-specific-processing protease 41)(Deubiquitinating enzyme 41) [Source:UniProtKB/Swiss-Prot;Acc:Q3LFD5] [ENST00000292729] |
| SERINC3 | 2.1  | 1.0 | 2.1 | Homo sapiens serine incorporator 3 (SERINC3), transcript variant 2, mRNA [NM_198941]                                                                                                                                         |
| DUSP5   | 3.2  | 1.5 | 2.1 | Homo sapiens dual specificity phosphatase 5 (DUSP5), mRNA [NM_004419]                                                                                                                                                        |
| ZNF695  | 2.1  | 1.0 | 2.1 | Homo sapiens zinc finger protein 695 (ZNF695), mRNA [NM_020394]                                                                                                                                                              |
| YARS    | 2.1  | 1.0 | 2.1 | Homo sapiens tyrosyl-tRNA synthetase (YARS), mRNA [NM_003680]                                                                                                                                                                |
| GORAB   | 2.1  | 1.0 | 2.1 | Homo sapiens golgin, RAB6-interacting (GORAB), transcript variant 1, mRNA [NM_152281]                                                                                                                                        |
| SCAMP1  | 2.1  | 1.0 | 2.1 | Homo sapiens secretory carrier membrane protein 1 (SCAMP1), mRNA [NM_004866]                                                                                                                                                 |
| CYP1B1  | 14.5 | 6.8 | 2.1 | Homo sapiens cytochrome P450, family 1, subfamily B, polypeptide 1 (CYP1B1), mRNA [NM_000104]                                                                                                                                |
| MTHFD1L | 2.8  | 1.3 | 2.1 | Homo sapiens methylenetetrahydrofolate dehydrogenase (NADP+ dependent) 1-like (MTHFD1L), mRNA [NM_015440]                                                                                                                    |
| MFAP3   | 2.1  | 1.0 | 2.1 | Homo sapiens microfibrillar-associated protein 3 (MFAP3), transcript variant 1, mRNA [NM_005927]                                                                                                                             |
| PIK3CA  | 2.1  | 1.0 | 2.1 | Homo sapiens phosphoinositide-3-kinase, catalytic, alpha polypeptide (PIK3CA), mRNA [NM_006218]                                                                                                                              |
| DDX31   | 3.2  | 1.5 | 2.1 | Homo sapiens DEAD (Asp-Glu-Ala-Asp) box polypeptide 31 (DDX31), transcript variant 2, mRNA [NM_138620]                                                                                                                       |
| PRRC1   | 2.1  | 1.0 | 2.1 | Homo sapiens proline-rich coiled-coil 1 (PRRC1), mRNA [NM_130809]                                                                                                                                                            |
| GPR137C | 2.1  | 1.0 | 2.1 | Homo sapiens G protein-coupled receptor 137C (GPR137C), mRNA [NM_001099652]                                                                                                                                                  |
| MITF    | 2.9  | 1.4 | 2.1 | Homo sapiens microphthalmia-associated transcription factor (MITF), transcript variant 1, mRNA [NM_198159]                                                                                                                   |
| MAFF    | 2.1  | 1.0 | 2.1 | Homo sapiens v-maf musculoaponeurotic fibrosarcoma oncogene homolog F (avian) (MAFF), transcript variant 1, mRNA [NM_012323]                                                                                                 |
| CTAGE4  | 2.1  | 1.0 | 2.1 | Homo sapiens CTAGE family, member 4 (CTAGE4), mRNA [NM_198495]                                                                                                                                                               |
| ZNF184  | 2.1  | 1.0 | 2.1 | Homo sapiens zinc finger protein 184 (ZNF184), mRNA [NM_007149]                                                                                                                                                              |

|         |     |      |      |                                                                                                                                                  |
|---------|-----|------|------|--------------------------------------------------------------------------------------------------------------------------------------------------|
| SLC6A6  | 2.1 | 1.0  | 2.1  | Homo sapiens solute carrier family 6 (neurotransmitter transporter, taurine), member 6 (SLC6A6), transcript variant 1, mRNA [NM_003043]          |
| PITPNM2 | 3.8 | 1.9  | 2.0  | Homo sapiens phosphatidylinositol transfer protein, membrane-associated 2 (PITPNM2), mRNA [NM_020845]                                            |
| MRRF    | 2.0 | 1.0  | 2.0  | Homo sapiens mitochondrial ribosome recycling factor (MRRF), nuclear gene encoding mitochondrial protein, transcript variant 2, mRNA [NM_199177] |
| ZNF518A | 2.0 | 1.0  | 2.0  | Homo sapiens zinc finger protein 518A (ZNF518A), mRNA [NM_014803]                                                                                |
| NDEL1   | 2.0 | 1.0  | 2.0  | Homo sapiens nudE nuclear distribution gene E homolog (A. nidulans)-like 1 (NDEL1), transcript variant 2, mRNA [NM_030808]                       |
| VPS8    | 2.0 | 1.0  | 2.0  | Homo sapiens vacuolar protein sorting 8 homolog (S. cerevisiae) (VPS8), transcript variant 1, mRNA [NM_001009921]                                |
| AMFR    | 2.0 | 1.0  | 2.0  | Homo sapiens autocrine motility factor receptor (AMFR), mRNA [NM_001144]                                                                         |
| ANKIB1  | 2.0 | 1.0  | 2.0  | Homo sapiens ankyrin repeat and IBR domain containing 1 (ANKIB1), mRNA [NM_019004]                                                               |
| SETD2   | 2.0 | 1.0  | 2.0  | Homo sapiens SET domain containing 2 (SETD2), mRNA [NM_014159]                                                                                   |
| ZNF84   | 2.0 | 1.0  | 2.0  | Homo sapiens zinc finger protein 84 (ZNF84), transcript variant 1, mRNA [NM_003428]                                                              |
| PDCD6IP | 2.0 | 1.0  | 2.0  | Homo sapiens programmed cell death 6 interacting protein (PDCD6IP), transcript variant 1, mRNA [NM_013374]                                       |
| GARS    | 2.0 | 1.0  | 2.0  | Homo sapiens glycyl-tRNA synthetase (GARS), mRNA [NM_002047]                                                                                     |
| LGMN    | 2.0 | 1.0  | 2.0  | Homo sapiens legumain (LGMN), transcript variant 2, mRNA [NM_001008530]                                                                          |
| RABL3   | 2.0 | 1.0  | 2.0  | Homo sapiens RAB, member of RAS oncogene family-like 3 (RABL3), mRNA [NM_173825]                                                                 |
| AGPAT6  | 2.0 | 1.0  | 2.0  | Homo sapiens 1-acylglycerol-3-phosphate O-acyltransferase 6 (lysophosphatidic acid acyltransferase, zeta) (AGPAT6), mRNA [NM_178819]             |
| RPS6KA3 | 2.0 | 1.0  | 2.0  | Homo sapiens ribosomal protein S6 kinase, 90kDa, polypeptide 3 (RPS6KA3), mRNA [NM_004586]                                                       |
| SIRT1   | 2.0 | 1.0  | 2.0  | Homo sapiens sirtuin (silent mating type information regulation 2 homolog) 1 (S. cerevisiae) (SIRT1), transcript variant 1, mRNA [NM_012238]     |
| FAM3C   | 2.0 | 1.0  | 2.0  | Homo sapiens family with sequence similarity 3, member C (FAM3C), transcript variant 1, mRNA [NM_014888]                                         |
| TMEM168 | 2.0 | 1.0  | 2.0  | Homo sapiens transmembrane protein 168 (TMEM168), mRNA [NM_022484]                                                                               |
| KRT37   | 3.6 | 1.8  | 2.0  | Homo sapiens keratin 37 (KRT37), mRNA [NM_003770]                                                                                                |
| AIDA    | 2.0 | 1.0  | 2.0  | Homo sapiens axin interactor, dorsalization associated (AIDA), mRNA [NM_022831]                                                                  |
| KCNQ4   | 2.1 | 1.1  | 2.0  | Homo sapiens potassium voltage-gated channel, subfamily G, member 4 (KCNQ4), mRNA [NM_172347]                                                    |
| CRKL    | 2.0 | 1.0  | 2.0  | Homo sapiens v-crk sarcoma virus CT10 oncogene homolog (avian)-like (CRKL), mRNA [NM_005207]                                                     |
| SMG1    | 2.0 | 1.0  | 2.0  | Homo sapiens SMG1 homolog, phosphatidylinositol 3-kinase-related kinase (C. elegans) (SMG1), mRNA [NM_015092]                                    |
| KLHDC5  | 2.0 | 1.0  | 2.0  | Homo sapiens kelch domain containing 5 (KLHDC5), mRNA [NM_020782]                                                                                |
| ZNF735  | 2.0 | 1.0  | 2.0  | Homo sapiens zinc finger protein 735 (ZNF735), mRNA [NM_001159524]                                                                               |
| FUT9    | 2.0 | 1.0  | 2.0  | Homo sapiens fucosyltransferase 9 (alpha (1,3) fucosyltransferase) (FUT9), mRNA [NM_006581]                                                      |
| SCD     | 2.0 | 1.0  | 2.0  | Homo sapiens stearoyl-CoA desaturase (delta-9-desaturase) (SCD), mRNA [NM_005063]                                                                |
| EI24    | 2.0 | 1.0  | 2.0  | Homo sapiens etoposide induced 2.4 mRNA (EI24), transcript variant 1, mRNA [NM_004879]                                                           |
| DOCK7   | 2.0 | 1.0  | 2.0  | Homo sapiens dedicator of cytokinesis 7 (DOCK7), mRNA [NM_033407]                                                                                |
| SLITRK4 | 3.0 | 1.5  | 2.0  | Homo sapiens SLIT and NTRK-like family, member 4 (SLITRK4), mRNA [NM_173078]                                                                     |
| CCDC49  | 2.0 | 1.0  | 2.0  | Homo sapiens coiled-coil domain containing 49 (CCDC49), mRNA [NM_017748]                                                                         |
| DDX58   | 2.0 | -2.3 | -0.9 | Homo sapiens DEAD (Asp-Glu-Ala-Asp) box polypeptide 58 (DDX58), mRNA [NM_014314]                                                                 |
| ZKSCAN5 | 2.2 | -2.5 | -0.9 | Homo sapiens zinc finger with KRAB and SCAN domains 5 (ZKSCAN5), transcript variant 1, mRNA [NM_014569]                                          |
| ADCK2   | 2.0 | -2.2 | -0.9 | Homo sapiens aarF domain containing kinase 2 (ADCK2), mRNA [NM_052853]                                                                           |
| PRKAA1  | 2.0 | -2.1 | -1.0 | Homo sapiens protein kinase, AMP-activated, alpha 1 catalytic subunit (PRKAA1), transcript variant 2, mRNA [NM_206907]                           |
| ARF1    | 2.1 | -2.2 | -1.0 | Homo sapiens ADP-ribosylation factor 1 (ARF1), transcript variant 1, mRNA [NM_001024227]                                                         |
| HKR1    | 2.1 | -2.0 | -1.1 | Homo sapiens GLI-Kruppel family member HKR1 (HKR1), mRNA [NM_181786]                                                                             |
| ZNF627  | 2.2 | -2.0 | -1.1 | Homo sapiens zinc finger protein 627 (ZNF627), mRNA [NM_145295]                                                                                  |
| PAN3    | 2.4 | -2.0 | -1.2 | Homo sapiens PAN3 poly(A) specific ribonuclease subunit homolog (S. cerevisiae) (PAN3), mRNA [NM_175854]                                         |

|        |     |      |      |                                                                                                            |
|--------|-----|------|------|------------------------------------------------------------------------------------------------------------|
| PRPF4B | 2.4 | -2.0 | -1.2 | Homo sapiens PRP4 pre-mRNA processing factor 4 homolog B (yeast) (PRPF4B), mRNA [NM_003913]                |
| BRWD1  | 2.9 | -2.3 | -1.3 | Homo sapiens bromodomain and WD repeat domain containing 1 (BRWD1), transcript variant 2, mRNA [NM_033656] |
| ZNF148 | 3.1 | -2.1 | -1.4 | Homo sapiens zinc finger protein 148 (ZNF148), mRNA [NM_021964]                                            |

<sup>1</sup>Fold change in gene expression of MCF-7/pLKO or MCF-7/H4Si4 untreated vs. 100 pM  $\beta$ -estradiol treatment for 6 hrs

<sup>2</sup>Fold reduction in expression in the absence of HER4/4ICD expressed as the ratio of Fold Change MCF-7/pLKO vs. Fold Change MCF-7/H4Si4
